# Supplementary material for: Bonding Interface and Repairability of 3D-Printed Intraoral Splints: Shear Bond Strength to Current Polymers, with and without Ageing
Source: Materials (Basel). 2021 Jul 14;14(14):3935. doi: 10.3390/ma14143935 (PMC8307865; doi:10.3390/ma14143935)

**Figure S1: Schematic drawing of shear bond testing setup**

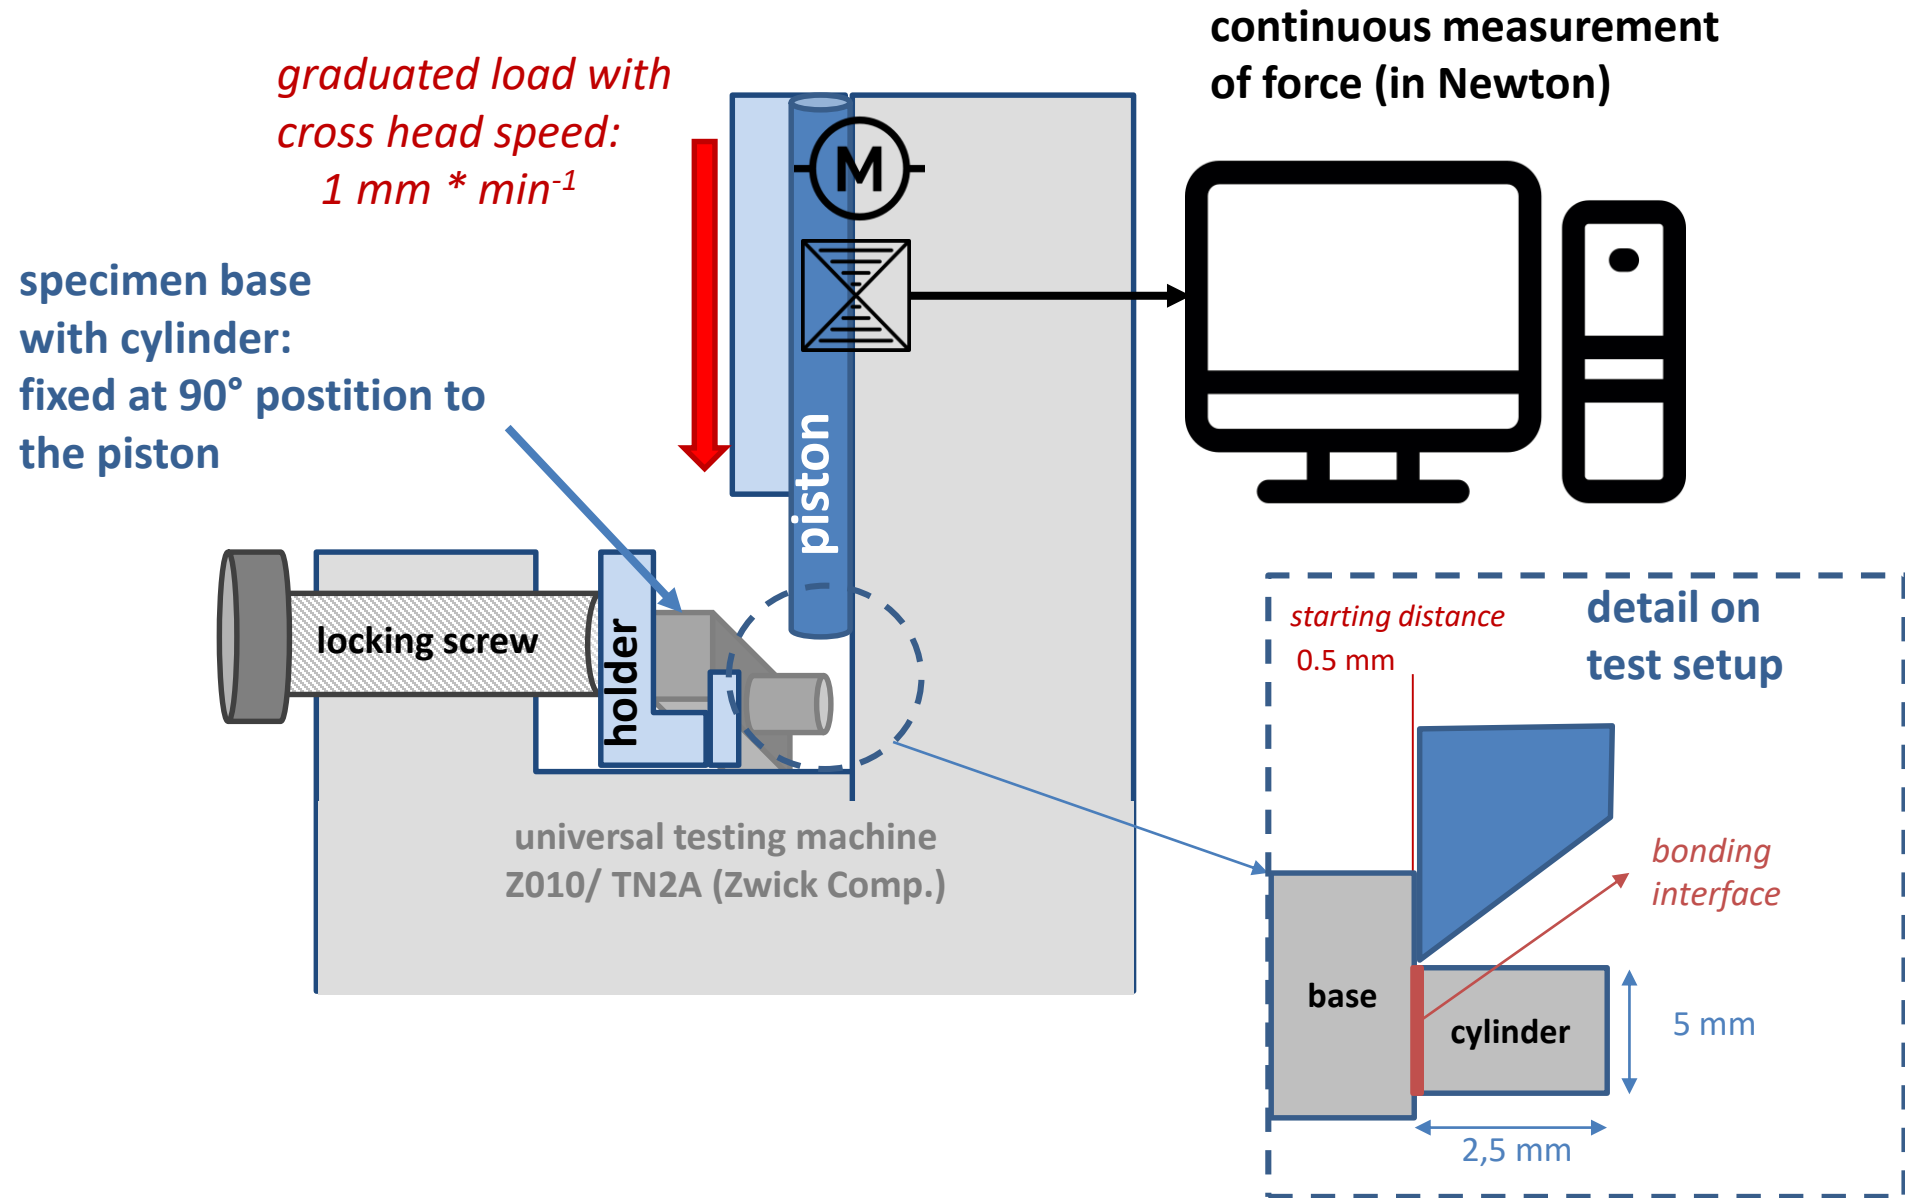

**PMMA base+BM: SEM (1000x); DRY STORAGE**

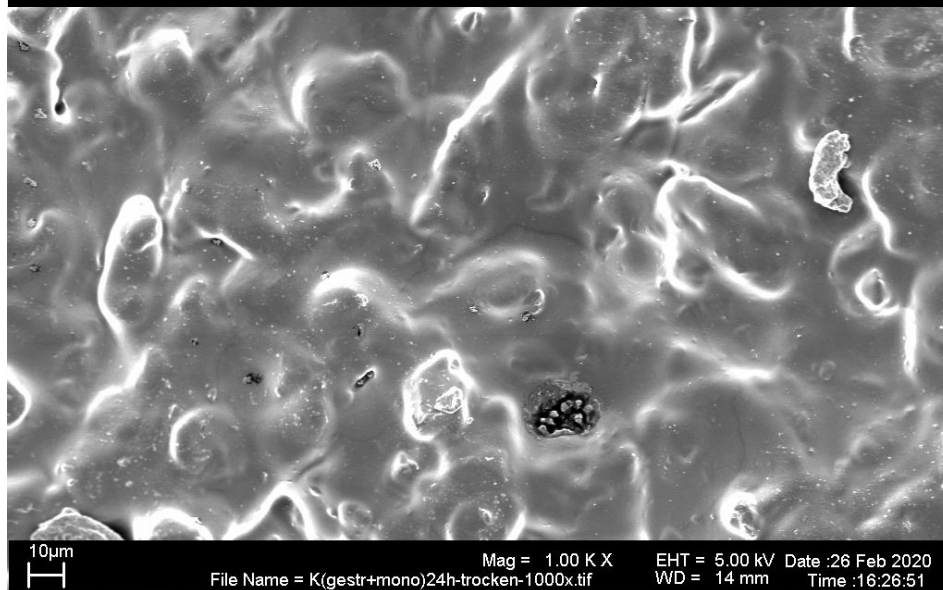

**PMMA base+BM: SEM (1000x), WET STORAGE**

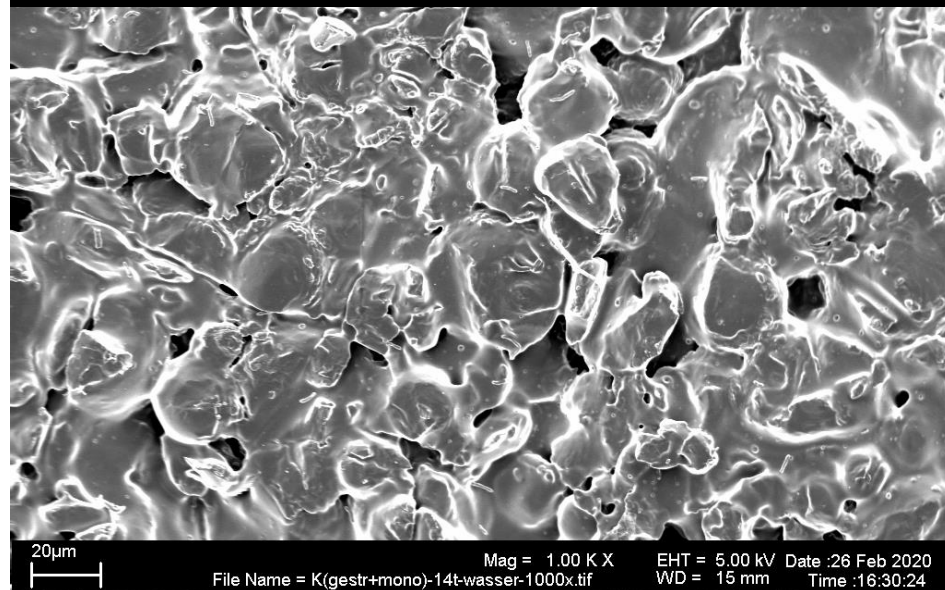

**PMMA base+BM: DRY STORAGE; 3D view of surface (Ra)**

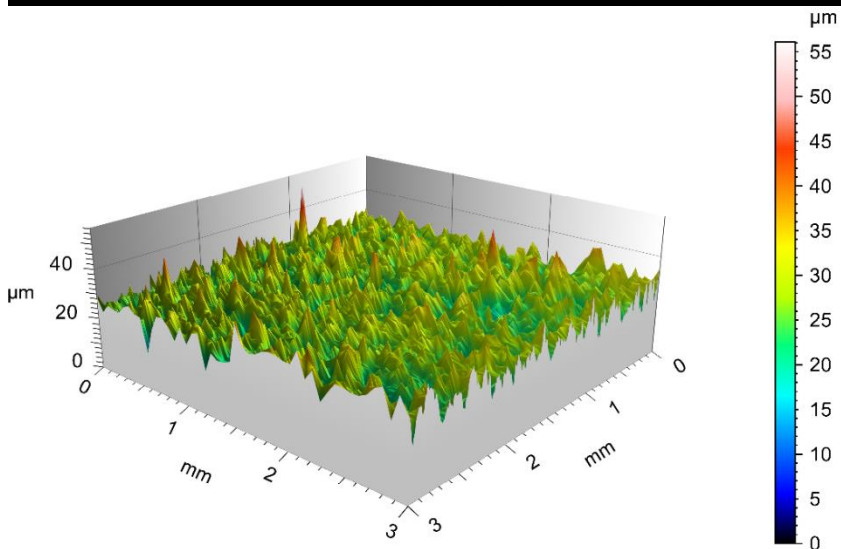

**PMMA base+BM: WET STORAGE; 3D view of surface (Ra)**

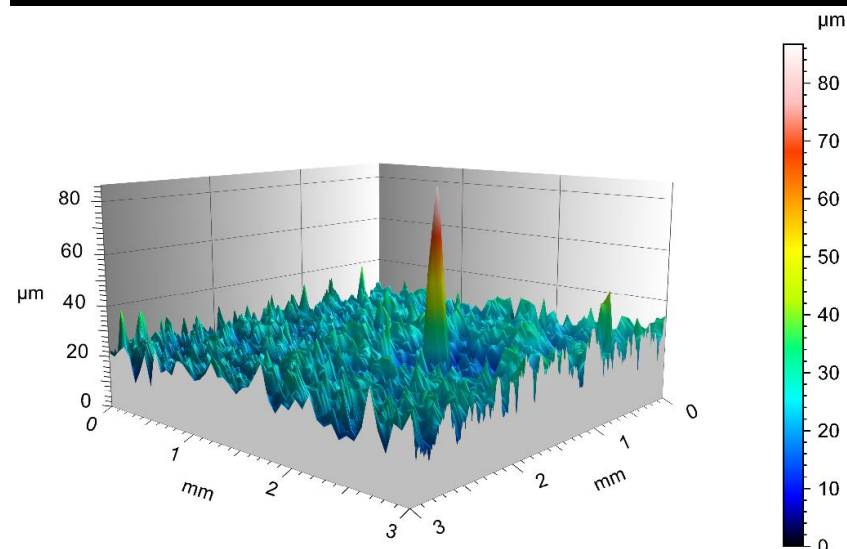

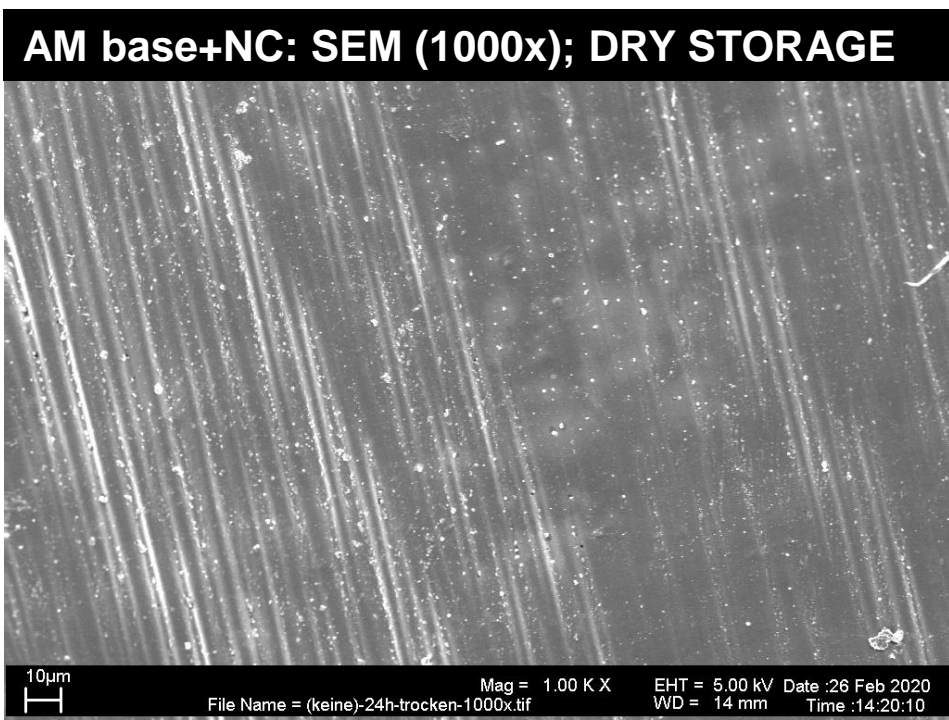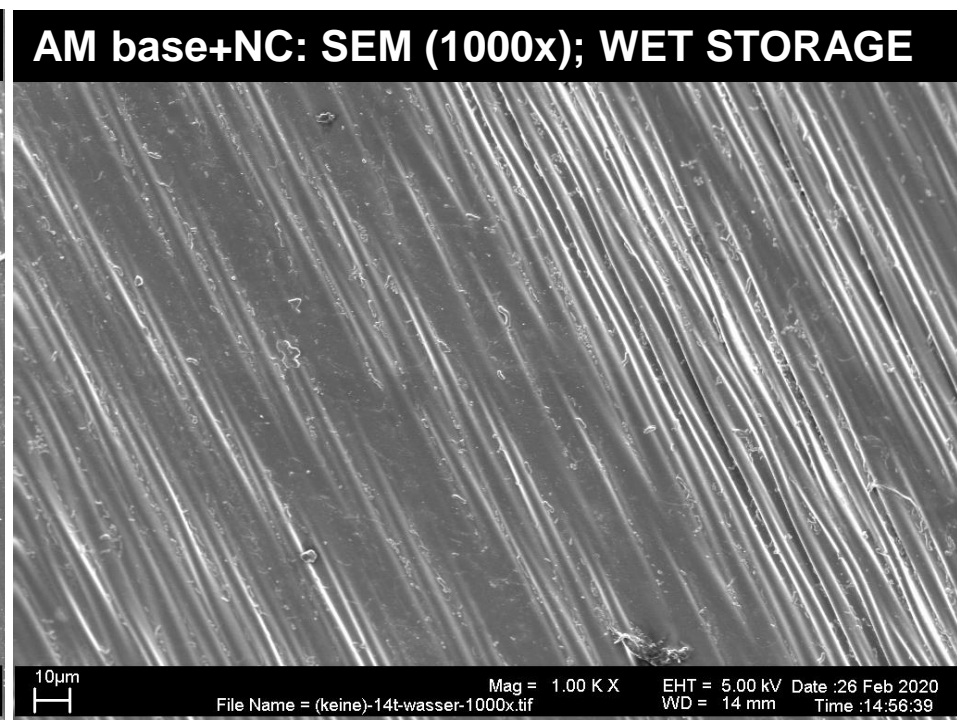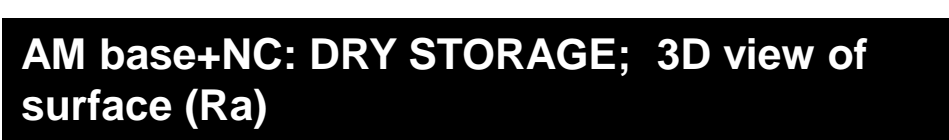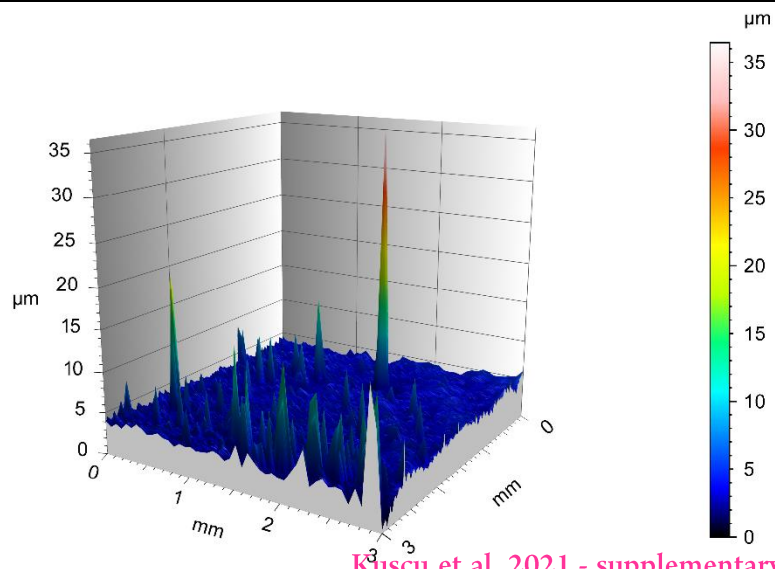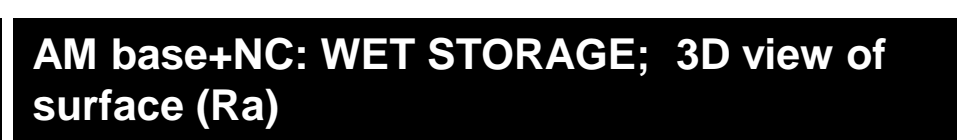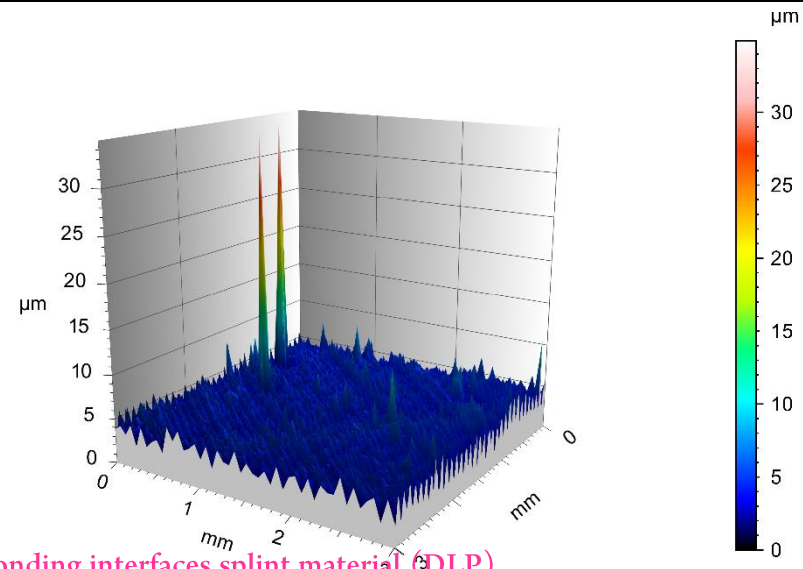

**AM base+B: SEM (1000x); DRY STORAGE**

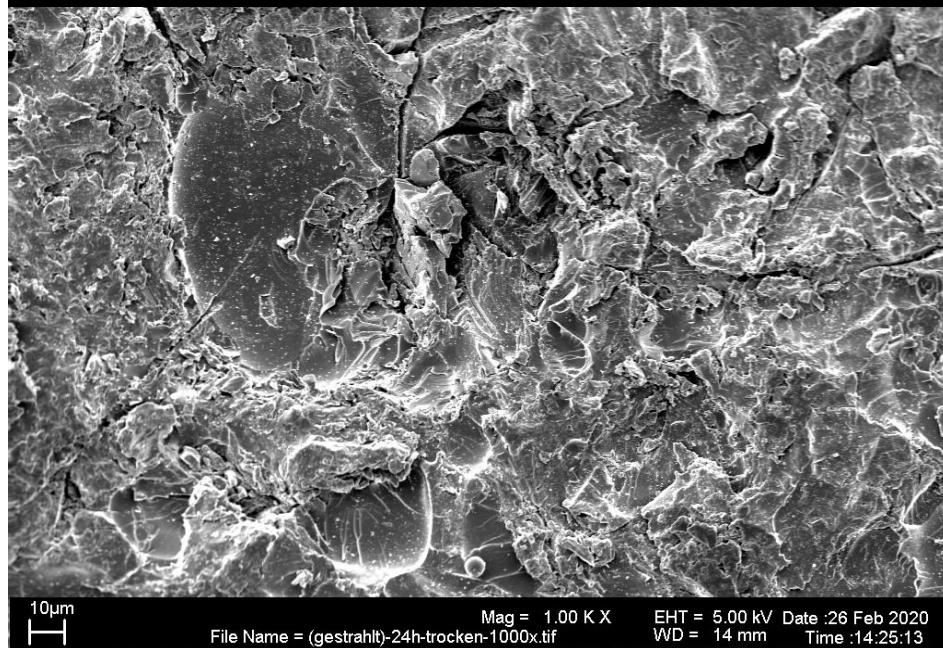

**AM base+B: SEM (1000x); WET STORAGE**

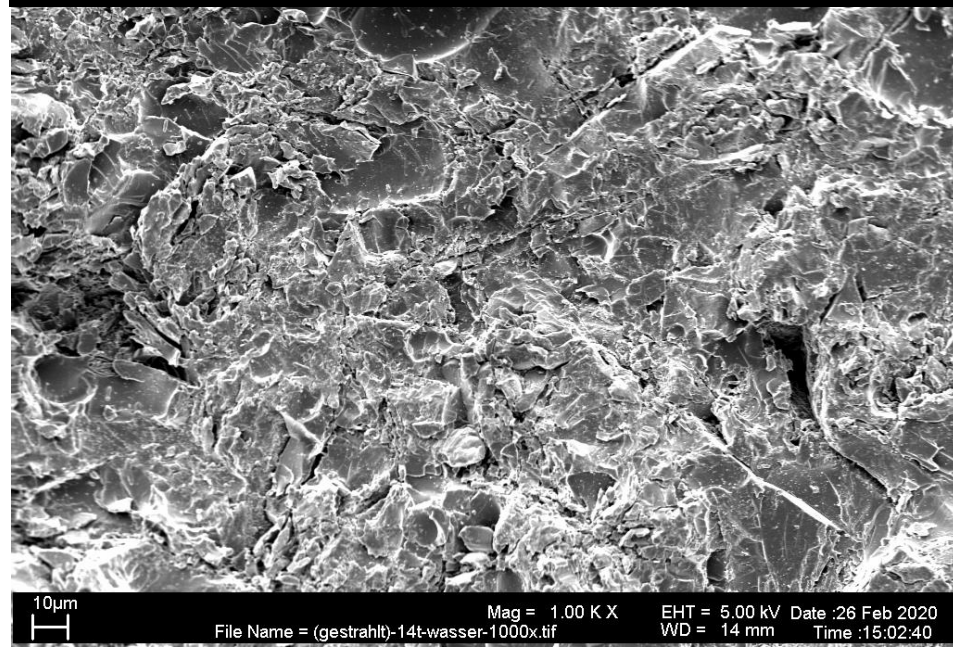

**AM base+B: DRY STORAGE; 3D view of surface (Ra)**

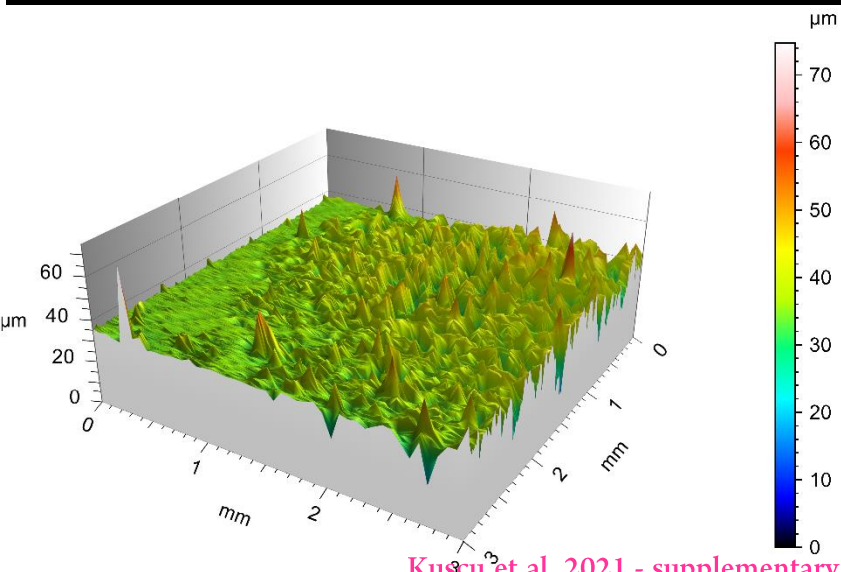

**AM base+B: WET STORAGE; 3D view of surface (Ra)**

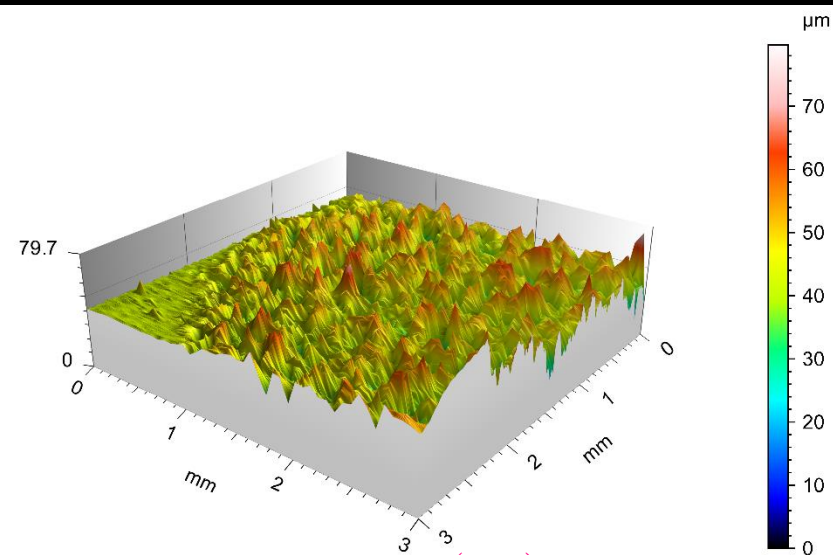

**AM base+M: SEM (1000x); DRY STORAGE**

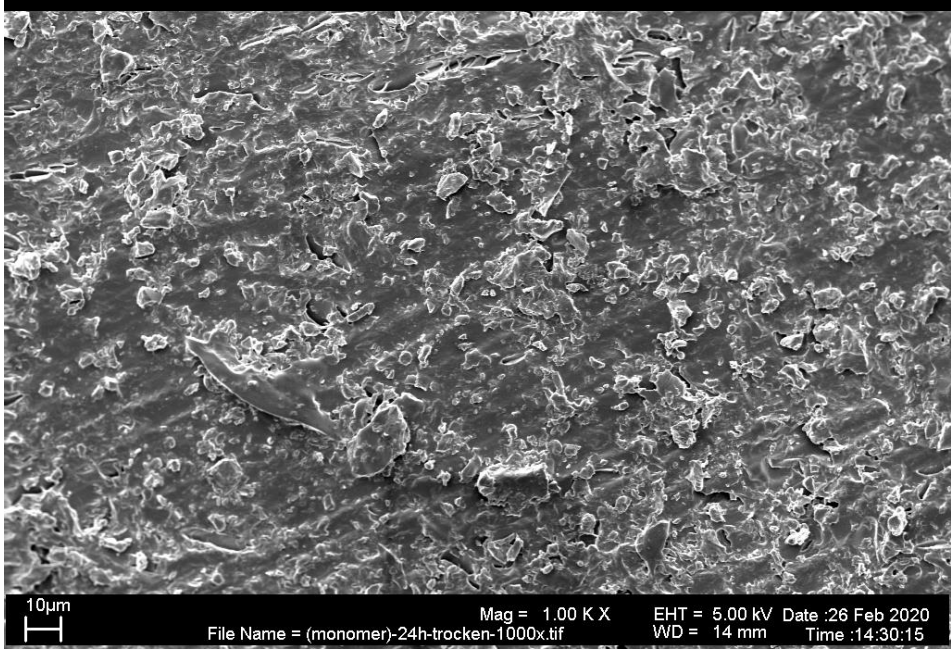

**AM base+M: SEM (1000x); WET STORAGE**

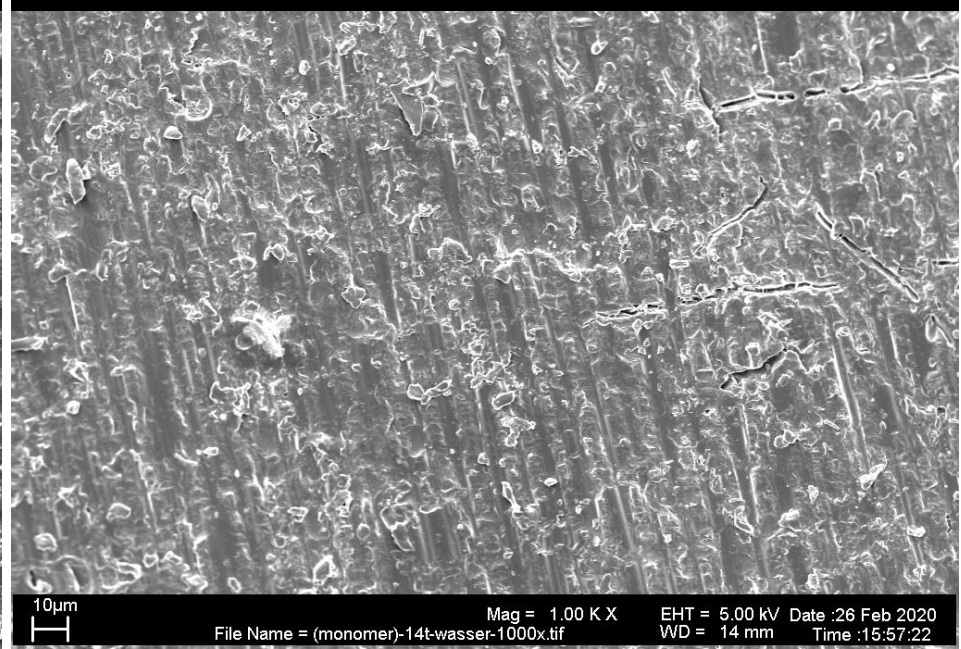

**AM base+M: DRY STORAGE; 3D view of surface (Ra)**

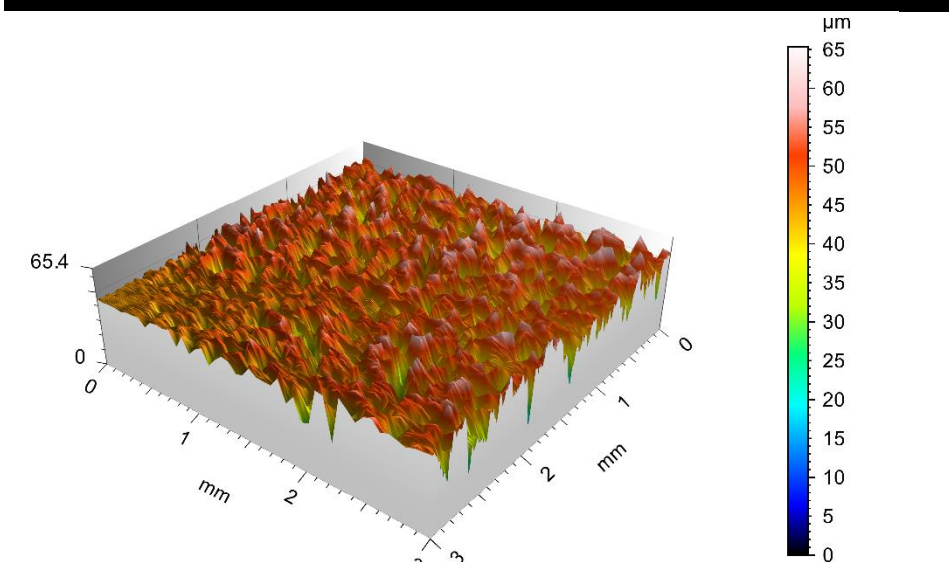

**AM base+M: WET STORAGE; 3D view of surface (Ra)**

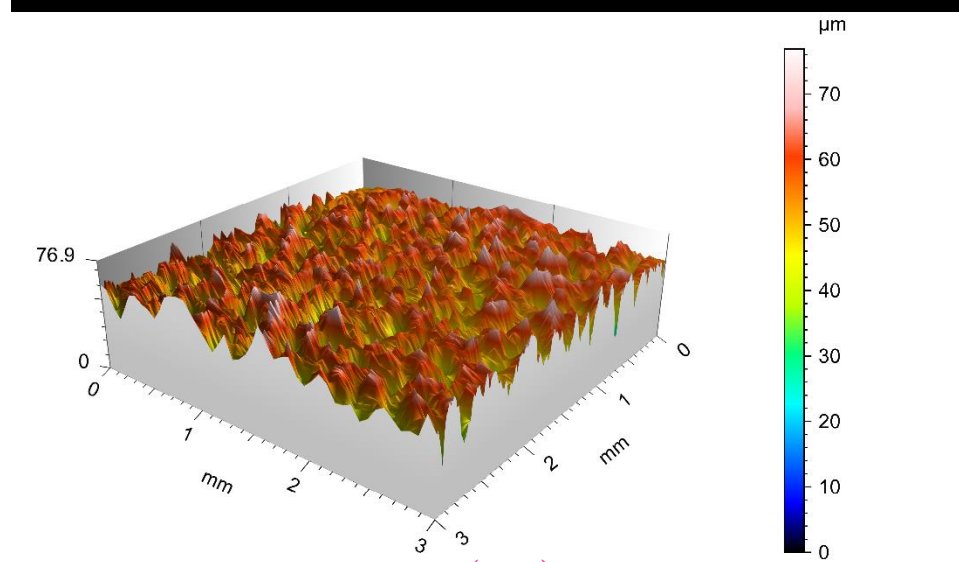

**AM base+BM: SEM (1000x); DRY STORAGE**

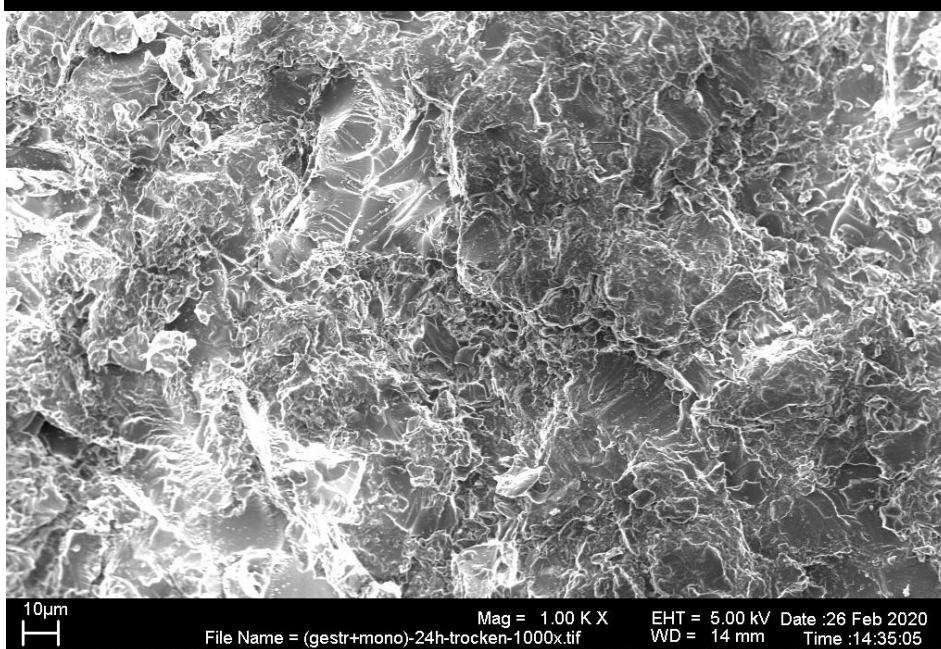

**AM base+BM: SEM (1000x); WET STORAGE**

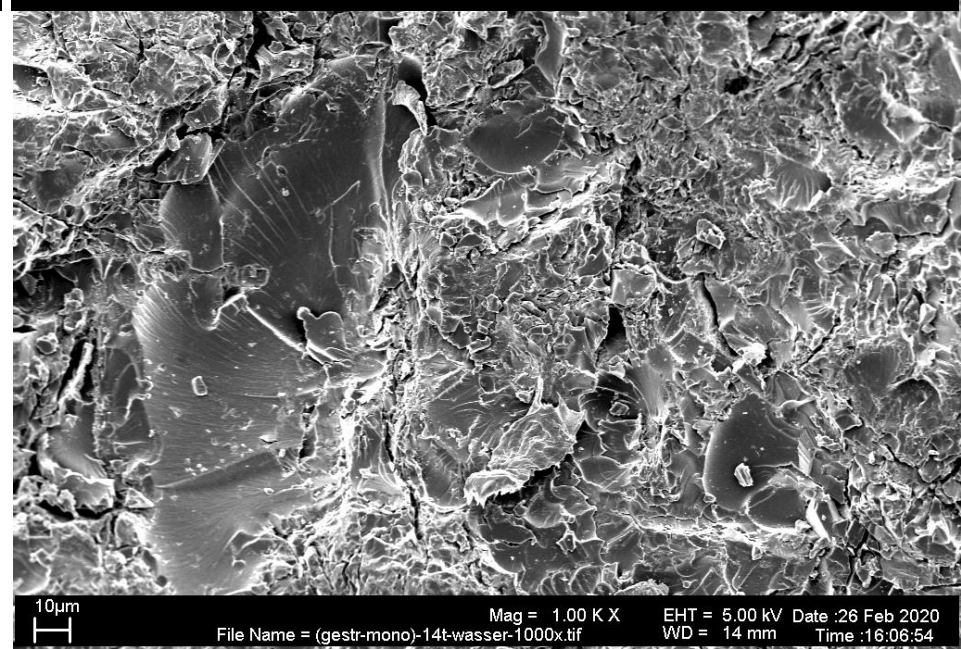

**AM base+BM: DRY STORAGE; 3D view of surface (Ra)**

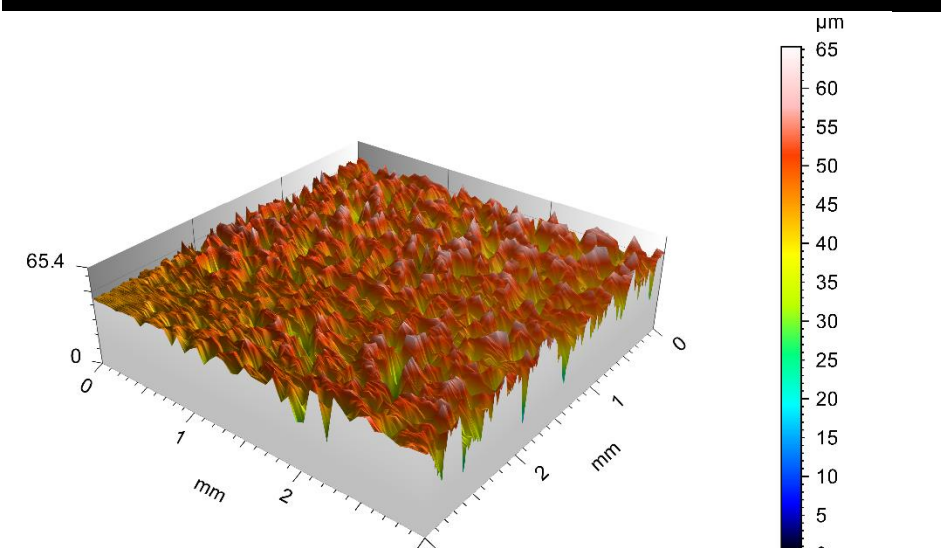

**AM base+BM: WET STORAGE; 3D view of surface (Ra)**

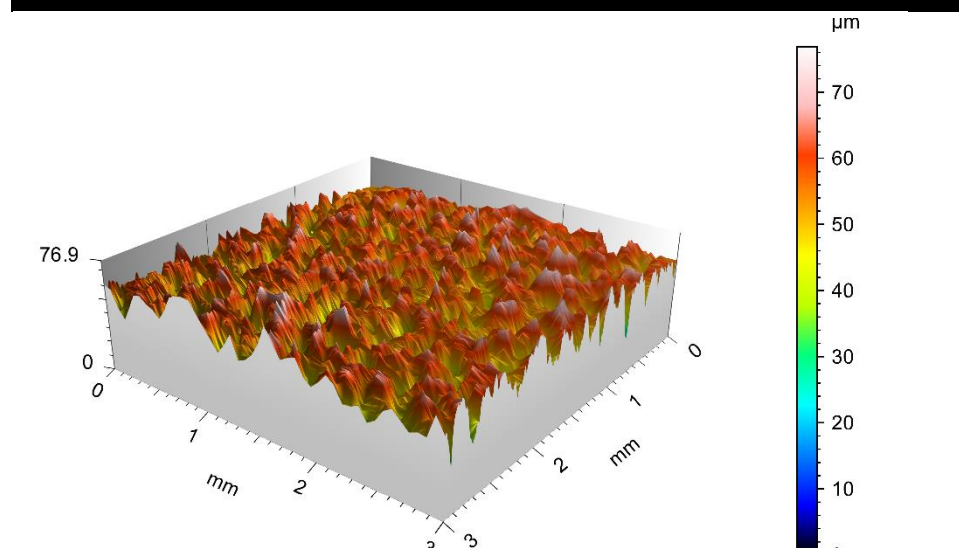

AM base+PS: SEM (1000x); DRY STORAGE

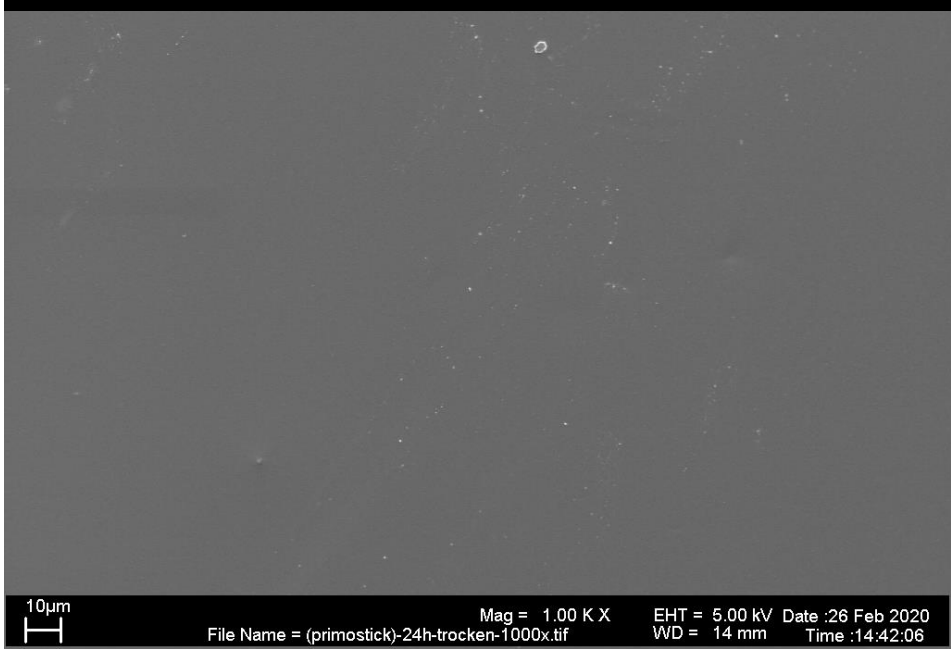

AM base+PS: SEM (1000x); WET STORAGE

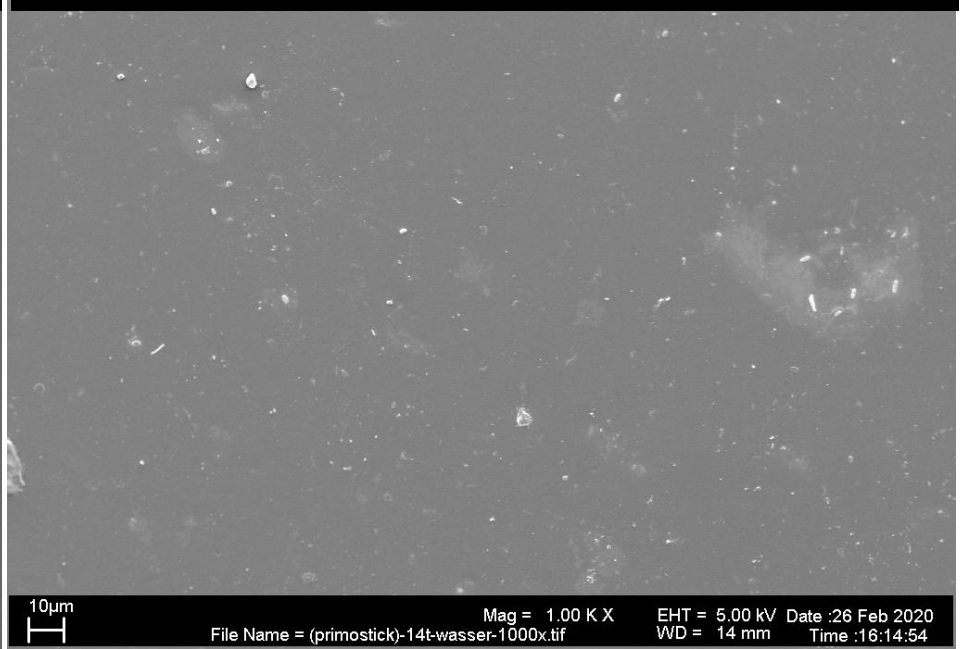

AM base+PS: DRY STORAGE; 3D view of surface (Ra)

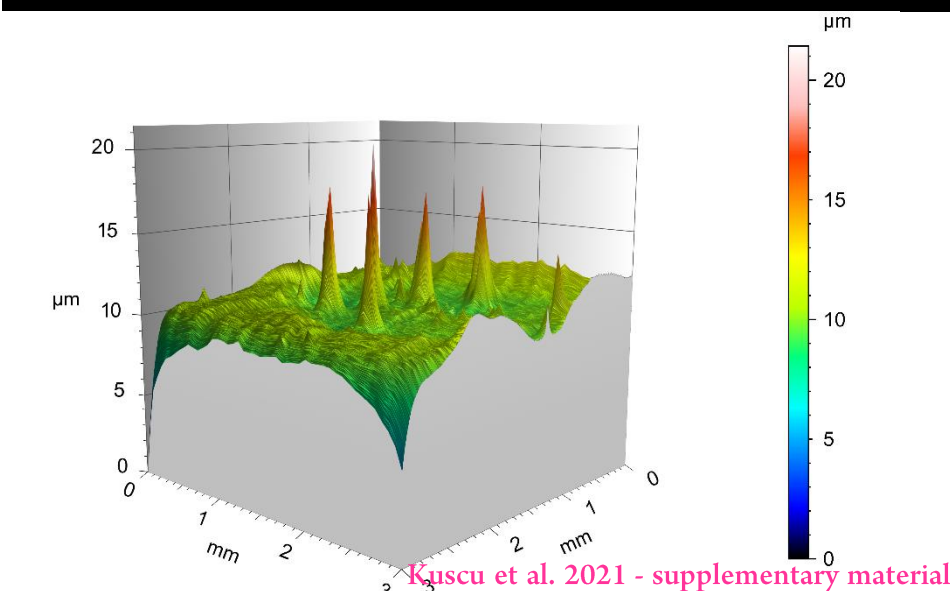

AM base+PS: WET STORAGE; 3D view of surface (Ra)

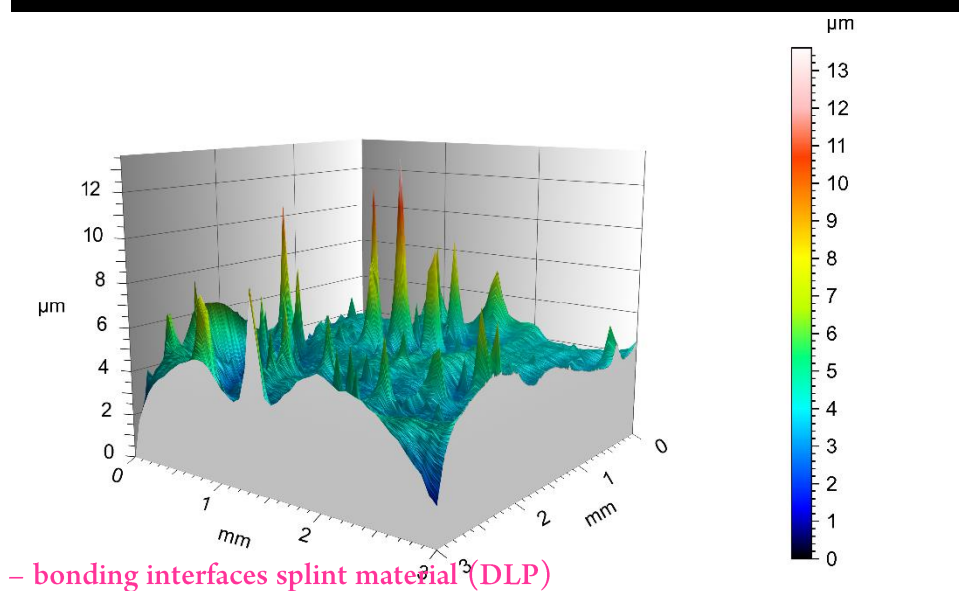

**AM base+B-PS: SEM (1000x); DRY STORAGE**

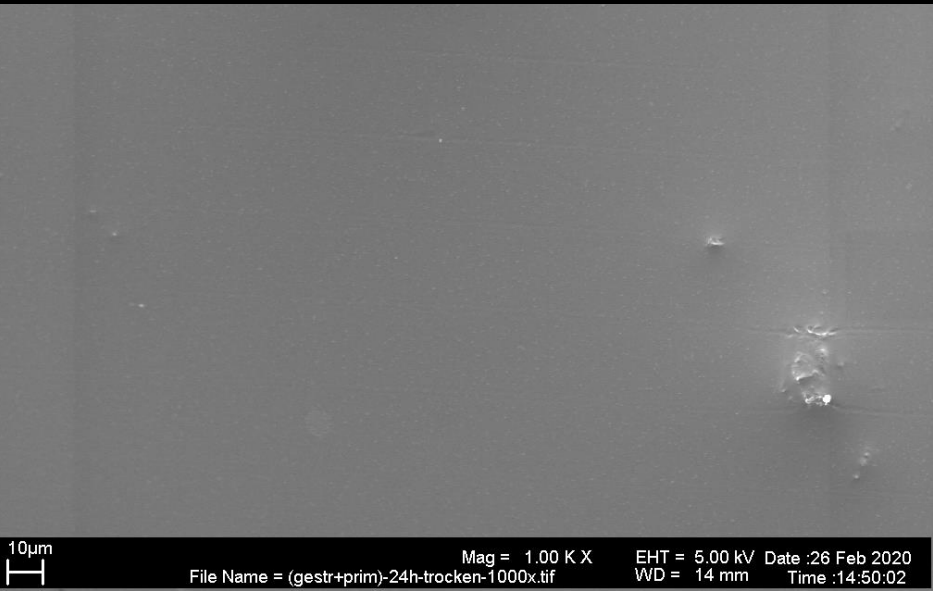

**AM base+B-PS: SEM (1000x); WET STORAGE**

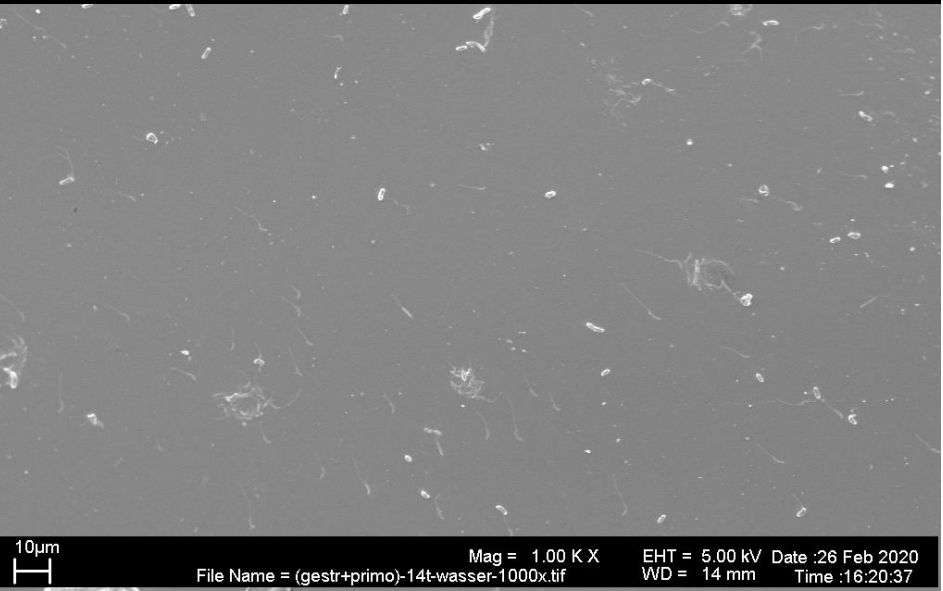

**AM base+B-PS: DRY STORAGE; 3D view of surface (Ra)**

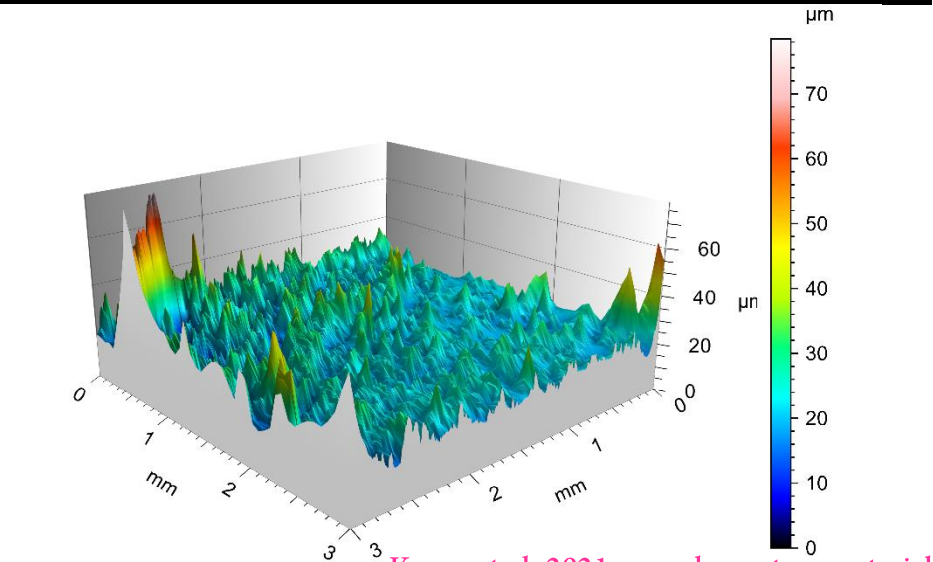

**AM base+B-PS: WET STORAGE; 3D view of surface (Ra)**

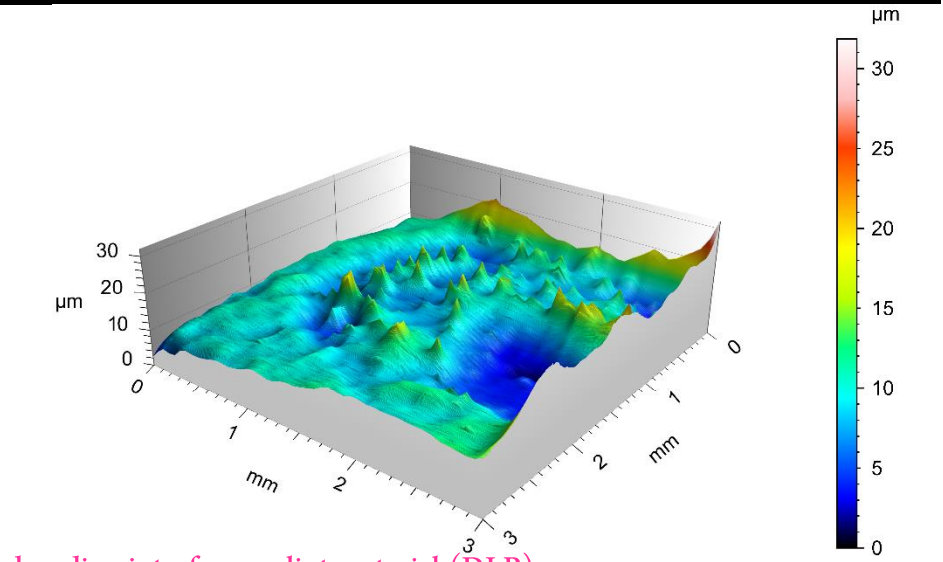

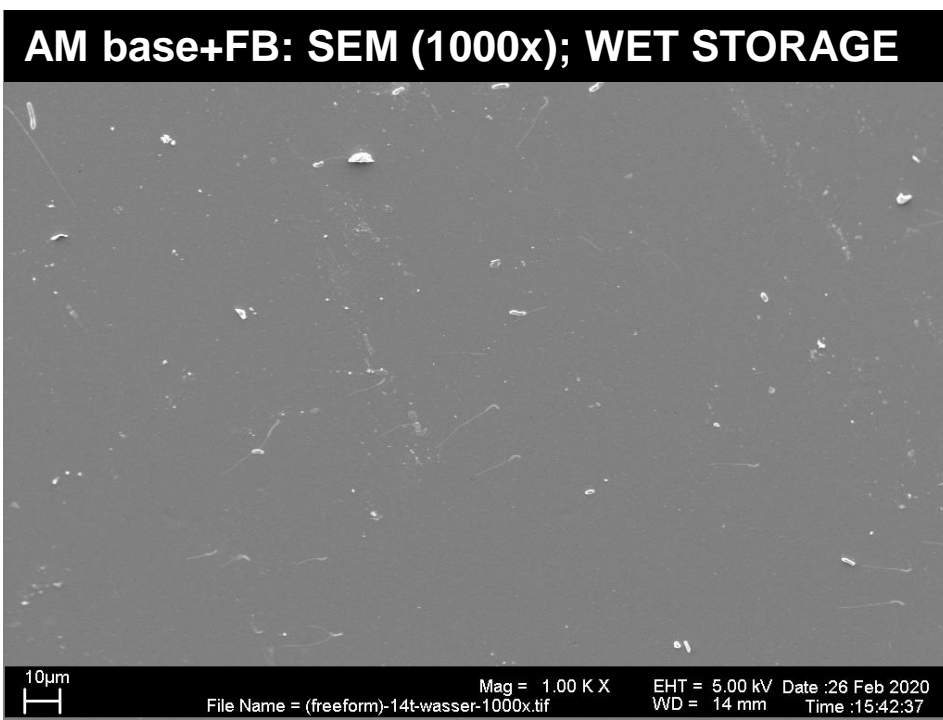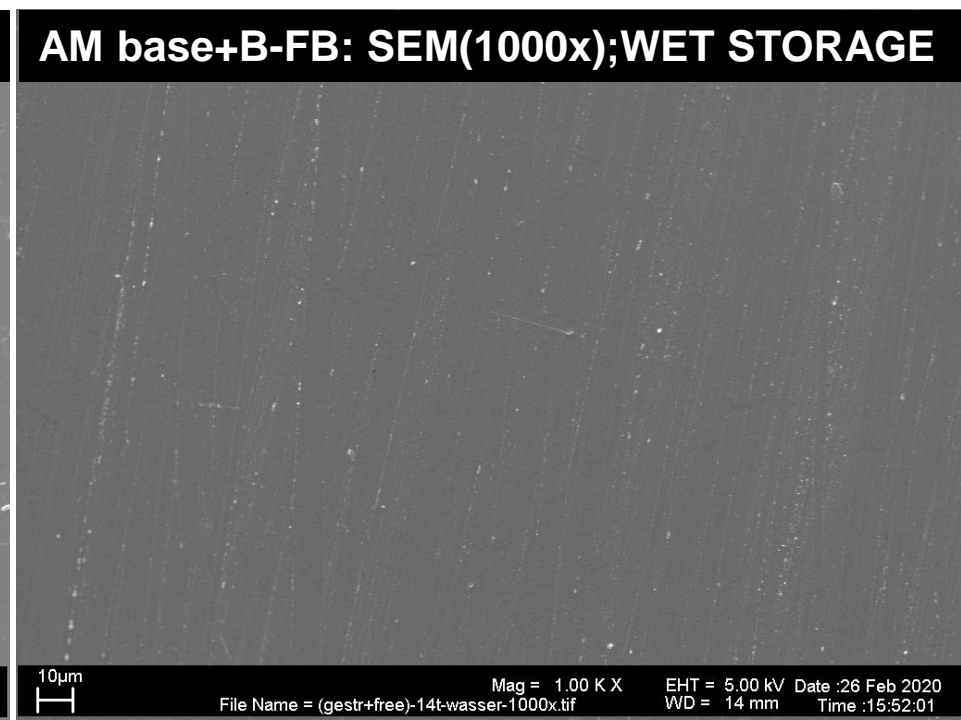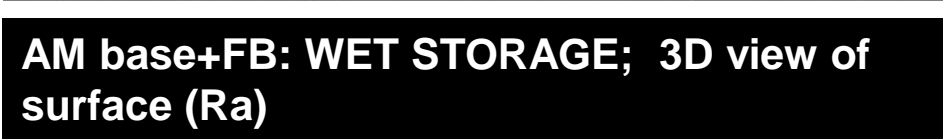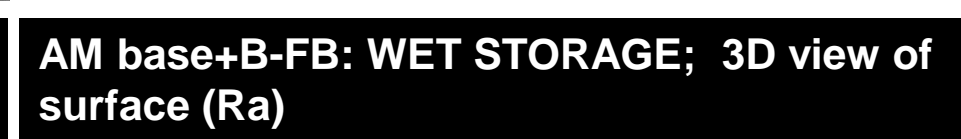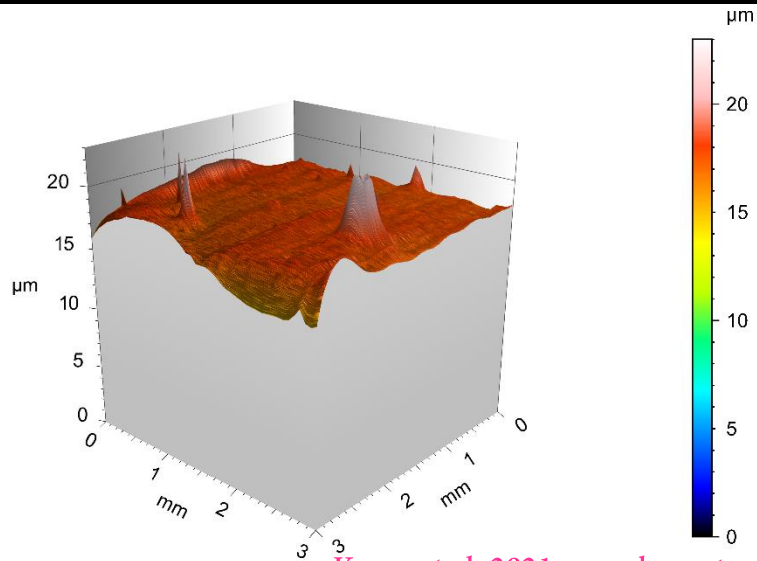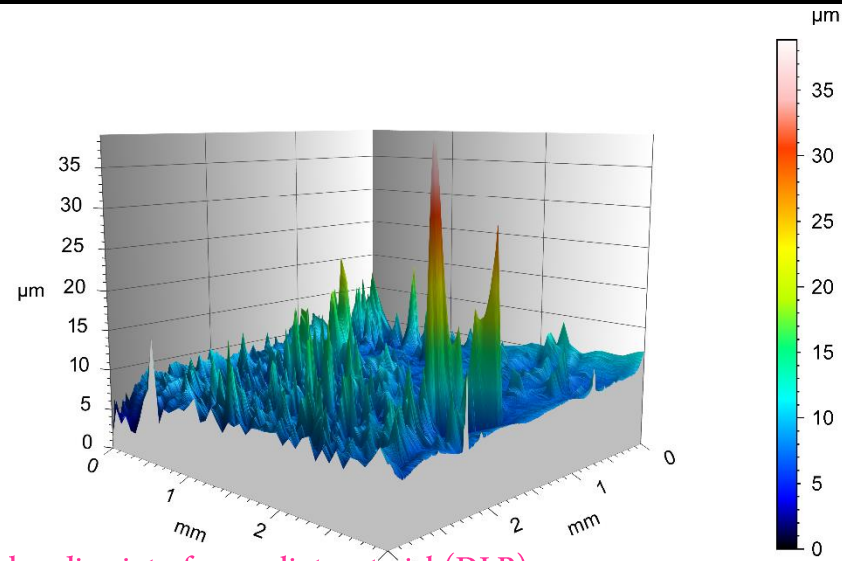

Supplement: Supplementary file 1 [file materials-14-03935-s001.zip › Supplement_2_Figures_S1-S9.pdf]
