# Supplementary material for: Bonding Interface and Repairability of 3D-Printed Intraoral Splints: Shear Bond Strength to Current Polymers, with and without Ageing
Source: Materials (Basel). 2021 Jul 14;14(14):3935. doi: 10.3390/ma14143935 (PMC8307865; doi:10.3390/ma14143935)
Supplement: Supplementary file 1 [file materials-14-03935-s001.zip › Supplement_1_Table_S1-S5.pdf]

Table S1 Composition of Materials

Table S1 Composition of Materials

|                                     |                                |                  |               |
|-------------------------------------|--------------------------------|------------------|---------------|
| <b>Product identifier:</b>          | Palapress® liquid              |                  |               |
| <b>Product code:</b>                | n. a.                          |                  |               |
| <b>Lot number; Expiration date:</b> | K010108; 16.05.2022            |                  |               |
| <b>Chemical Characterization:</b>   | Mixture based on methacrylates |                  |               |
| <b>Components:</b>                  | <b>CAS No:</b>                 | <b>Quantity:</b> | <b>EG No:</b> |
| methyl methacrylate (MMA)           | 80-62-6                        | >90%             | 201-297-1     |
| tetramethylene dimethacrylate       | 2082-81-7                      | 0- 5%            | 218-218-1     |
| methyltriocylammonium chloride      | 5137-55-3                      | <1%              | 225-896-2     |

|                                     |                                          |                  |               |
|-------------------------------------|------------------------------------------|------------------|---------------|
| <b>Product identifier:</b>          | Palapress® powder                        |                  |               |
| <b>Product code:</b>                | n. a.                                    |                  |               |
| <b>Lot number; Expiration date:</b> | K010048; 07.11.2021                      |                  |               |
| <b>Chemical Characterization:</b>   | Product based on methacrylate copolymers |                  |               |
| <b>Components:</b>                  | <b>CAS No:</b>                           | <b>Quantity:</b> | <b>EG No:</b> |
| Copolymerisat                       | 25086-15-1                               | 10- 25%          | n. a.         |

**Table S1 Composition of Materials**

|                                                   |                                                   |                  |               |
|---------------------------------------------------|---------------------------------------------------|------------------|---------------|
| <b>Product identifier:</b>                        | primosplint, primotec®                            |                  |               |
| <b>Product code:</b>                              | 1370110                                           |                  |               |
| <b>Lot number;</b>                                | 193138; 2021-08                                   |                  |               |
| <b>Expiration date:</b>                           |                                                   |                  |               |
| <b>Chemical Characterization:</b>                 | Mixture of acrylic resins, fillers and initiators |                  |               |
| <b>Light curing:</b>                              | -320 nm -400 nm<br>-UV- A- Light source           |                  |               |
| <b>Components:</b>                                | <b>CAS No:</b>                                    | <b>Quantity:</b> | <b>EG No:</b> |
| Urethane dimethacrylate (UDMA)                    | 72869-86-4                                        | 20- 50%          | n. a.         |
| tricyclodecan dimethanol diacrylate (TCDDMDA)     | 42594-17-2                                        | <20%             | n. a.         |
| Diphenyl (2,4,6-trimethylbenzoyl) phosphine oxide | 75980-60-8                                        | <1%              | 278-355-8     |

|                                                      |                                                                 |                  |               |
|------------------------------------------------------|-----------------------------------------------------------------|------------------|---------------|
| <b>Product identifier:</b>                           | freeform® fixgel                                                |                  |               |
| <b>Product code:</b>                                 | 10340                                                           |                  |               |
| <b>Lot number;</b>                                   | 210801; 2020-08                                                 |                  |               |
| <b>Expiration date:</b>                              |                                                                 |                  |               |
| <b>Chemical Characterization:</b>                    | Mixture of acrylic/ methacrylic resins with auxilliary matters. |                  |               |
| <b>Light curing:</b>                                 | -320 nm- 400 nm<br>-UV/ UV- A- Light source                     |                  |               |
| <b>Components:</b>                                   | <b>CAS No:</b>                                                  | <b>Quantity:</b> | <b>EG No:</b> |
| tetrahydrofurfuryl methacrylate THFMA purified grade | 2455-24-5                                                       | 5- 25%           | n. a.         |
| Diphenyl (2,4,6-trimethylbenzoyl) phosphine oxide    | 75980-60-8                                                      | <1%              | 278-355-8     |

|                                                   |                                                                |                  |               |
|---------------------------------------------------|----------------------------------------------------------------|------------------|---------------|
| <b>Product identifier:</b>                        | freeform® plast                                                |                  |               |
| <b>Product code:</b>                              | 10257                                                          |                  |               |
| <b>Lot number;</b>                                | 210601; 2020-06                                                |                  |               |
| <b>Expiration date:</b>                           |                                                                |                  |               |
| <b>Chemical Characterization:</b>                 | Mixture of acrylic/ methacrylic resins with auxilliary matters |                  |               |
| <b>Light curing:</b>                              | -320 nm- 400 nm<br>-UV/ UV- A- Light source                    |                  |               |
| <b>Components:</b>                                | <b>CAS No:</b>                                                 | <b>Quantity:</b> | <b>EG No:</b> |
| Tricyclodecane dimethanol diacrylate              | 42594-17-2                                                     | 10- <15%         | 255-901-3     |
| Diphenyl (2,4,6-trimethylbenzoyl) phosphine oxide | 75980-60-8                                                     | <1%              | 278-355-8     |

Table S1 Composition of Materials

|                                                          |                                                                                           |                  |               |
|----------------------------------------------------------|-------------------------------------------------------------------------------------------|------------------|---------------|
| <b>Product identifier:</b>                               | primostick®                                                                               |                  |               |
| <b>Product code:</b>                                     | 1370120                                                                                   |                  |               |
| <b>Lot number;</b>                                       | 201202; 2023-03                                                                           |                  |               |
| <b>Expiration date:</b>                                  |                                                                                           |                  |               |
| <b>Chemical Characterization:</b>                        | -light curing bonding agent for primosplint<br>-Mixture of acrylic resins and initiators. |                  |               |
| <b>Light curing:</b>                                     | -n. a.                                                                                    |                  |               |
| <b>Components:</b>                                       | <b>CAS No:</b>                                                                            | <b>Quantity:</b> | <b>EG No:</b> |
| methyl methacrylate;                                     | 80-62-6                                                                                   | 20- 60%          | 201-297-1     |
| acrylic resin                                            | n. a.                                                                                     | <25%             | n. a.         |
| 2-Propenoic acid, reaction products with pentaerythritol | 1245638-61-2                                                                              | <20%             | 629-850-6     |
| Diphenyl (2,4,6-trimethylbenzoyl) phosphine oxide        | 75980-60-8                                                                                | <3%              | 278-355-8     |

|                                                   |                                                                                                                    |                  |               |
|---------------------------------------------------|--------------------------------------------------------------------------------------------------------------------|------------------|---------------|
| <b>Product identifier:</b>                        | freeform® bond                                                                                                     |                  |               |
| <b>Product code:</b>                              | 10571.2                                                                                                            |                  |               |
| <b>Lot number;</b>                                | 200710; 2019-07                                                                                                    |                  |               |
| <b>Expiration date:</b>                           |                                                                                                                    |                  |               |
| <b>Chemical Characterization:</b>                 | -bonding agent for lighth curing repair material<br>-Mixture of acrylic/ methacrylic resins with auxiliary matters |                  |               |
| <b>Light curing:</b>                              | -320 nm- 400 nm<br>-UV/ UV- A- Light source                                                                        |                  |               |
| <b>Components:</b>                                | <b>CAS No:</b>                                                                                                     | <b>Quantity:</b> | <b>EG No:</b> |
| methyl methacrylate, MMA;                         | 80-62-6                                                                                                            | 20- 70%          | 201-297-1     |
| methyl 2-methylprop-2-enoate;                     |                                                                                                                    |                  |               |
| acrylic acid derivatives                          | n. a.                                                                                                              | 25- 50%          | n. a.         |
| aliphatic polyestertriurethane triacrylate        | n. a.                                                                                                              | 5- 20%           |               |
| vinylester resin                                  | 55818-57-0                                                                                                         | 1- <5%           | n. a.         |
| Diphenyl (2,4,6-trimethylbenzoyl) phosphine oxide | 75980-60-8                                                                                                         | 0,1- 5%          | 278-355-8     |

|                                                   |                                                                                   |                  |               |
|---------------------------------------------------|-----------------------------------------------------------------------------------|------------------|---------------|
| <b>Product identifier:</b>                        | Freeprint ® splint 2.0 UV                                                         |                  |               |
| <b>Product code:</b>                              | 1113                                                                              |                  |               |
| <b>Lot number;</b>                                | 220405; 2021-04                                                                   |                  |               |
| <b>Expiration date:</b>                           |                                                                                   |                  |               |
| <b>Chemical Characterization:</b>                 | light curing resin based on (meth) acrylate for additive manufacturing of splints |                  |               |
| <b>Light curing:</b>                              | -for DLP-printers with UV-LED 385 nm                                              |                  |               |
| <b>Components:</b>                                | <b>CAS No:</b>                                                                    | <b>Quantity:</b> | <b>EG No:</b> |
| isopropylidenediphenol                            | 41637-38-1                                                                        | 90- <95%         | n. a.         |
| peg-2 dimethacrylate                              |                                                                                   |                  |               |
| (5-ethyl-1,3-dioxan-5-yl) methyl acrylate         | 66492-51-1                                                                        | 1- <5%           | n. a.         |
| Diphenyl (2,4,6-trimethylbenzoyl) phosphine oxide | 75980-60-8                                                                        | 1- <5%           | 015-203-00-X  |

**Table S2 Results of Dunnett's test for statistical significance of shear bond strength (SBS) distributions in the dry and wet storage group compared to the gold standard (PMMA-base+BM/Palapress)** Positive values show pairs of means that are significantly different.

|d| = 2,83

**DRY STORAGE**

| Comparison to PMMA-base+BM/Palapress | Abs(Dif)-LSD | p-Value |
|--------------------------------------|--------------|---------|
| AM-base+BM/Palapress                 | -0,41        | 0,1363  |
| AM-base+NC/Palapress                 | 0,876        | 0,0033* |
| AM-base+M/Palapress                  | 2,728        | <,0001* |
| AM-base+B/Palapress                  | 4,732        | <,0001* |
| AM-base+B/freeprint splint 2         | 6,532        | <,0001* |
| AM-base+NC/freeprint splint 2        | 8,303        | <,0001* |
| AM-base+B/freeform fixgel            | 13,64        | <,0001* |
| AM-base+B/freeform plast             | 15,42        | <,0001* |
| AM-base+B-PS/primosplint             | 15,56        | <,0001* |
| AM-base+PS/primosplint               | 16,57        | <,0001* |
| AM-base+NC/freeform fixgel           | 17,23        | <,0001* |
| AM-base+NC/freeform plast            | 17,84        | <,0001* |
| AM-base+B/primosplint                | 18,28        | <,0001* |
| AM-base+NC/primosplint               | 18,37        | <,0001* |

|d| = 2,89

**WET STORAGE**

| Comparison to PMMA-base+BM/Palapress | Abs(Dif)-LSD | p-Value |
|--------------------------------------|--------------|---------|
| AM-base+NC/Palapress                 | -2,57        | 1,0000  |
| AM-base+BM/Palapress                 | 1,266        | 0,0010* |
| AM-base+B/Palapress                  | 4,358        | <,0001* |
| AM-base+B-FB/freeform plast          | 5,127        | <,0001* |
| AM-base+FB/freeform fixgel           | 6,128        | <,0001* |
| AM-base+B/freeform fixgel            | 6,325        | <,0001* |
| AM-base+M/Palapress                  | 8,164        | <,0001* |
| AM-base+B-FB/freeform fixgel         | 9,514        | <,0001* |
| AM-base+B/freeform plast             | 11,59        | <,0001* |
| AM-base+B/freeprint splint 2         | 12,07        | <,0001* |
| AM-base+NC/freeform fixgel           | 12,33        | <,0001* |
| AM-base+FB/freeform plast            | 12,73        | <,0001* |
| AM-base+PS/primosplint               | 13,19        | <,0001* |
| AM-base+B/primosplint                | 13,22        | <,0001* |
| AM-base+B-PS/primosplint             | 14,24        | <,0001* |
| AM-base+NC/freeprint splint 2        | 14,88        | <,0001* |
| AM-base+NC/freeform plast            | 16,96        | <,0001* |
| AM-base+NC/primosplint               | 17,48        | <,0001* |

**Table S3 Non-parametric multiple comparison with Wilcoxon each pair test of the SBS distributions in the experimental groups with dry storage**

| Comparison of groups with dry storage (Table S3) |                               | Score Mean Difference | Std Err Dif | Z       | p-Value | Hodges-Lehmann | Lower CL | Upper CL |
|--------------------------------------------------|-------------------------------|-----------------------|-------------|---------|---------|----------------|----------|----------|
| AM-base+M/Palapress                              | AM-base+B/freeform plast      | 19,9500               | 3,696846    | 5,39649 | <,0001* | 12,7736        | 10,0977  | 14,8004  |
| AM-base+M/Palapress                              | AM-base+B/primosplint         | 19,9500               | 3,696846    | 5,39649 | <,0001* | 15,3607        | 13,0663  | 17,8206  |
| AM-base+B/Palapress                              | AM-base+B/freeform plast      | 19,9500               | 3,696846    | 5,39649 | <,0001* | 10,6735        | 8,6239   | 12,5108  |
| AM-base+B/Palapress                              | AM-base+B/primosplint         | 19,9500               | 3,696846    | 5,39649 | <,0001* | 13,3266        | 11,6129  | 15,0540  |
| AM-base+B/Palapress                              | AM-base+B-PS/primosplint      | 19,9500               | 3,696846    | 5,39649 | <,0001* | 10,6184        | 9,0128   | 12,5204  |
| AM-base+BM/Palapress                             | AM-base+B/freeform plast      | 19,9500               | 3,696846    | 5,39649 | <,0001* | 16,0275        | 14,1876  | 17,6860  |
| AM-base+BM/Palapress                             | AM-base+B/freeform fixgel     | 19,9500               | 3,696846    | 5,39649 | <,0001* | 14,6530        | 11,9842  | 16,8673  |
| AM-base+BM/Palapress                             | AM-base+PS/primosplint        | 19,9500               | 3,696846    | 5,39649 | <,0001* | 17,1120        | 15,8872  | 18,8508  |
| AM-base+BM/Palapress                             | AM-base+B/primosplint         | 19,9500               | 3,696846    | 5,39649 | <,0001* | 18,6334        | 17,0790  | 20,1791  |
| AM-base+BM/Palapress                             | AM-base+B-PS/primosplint      | 19,9500               | 3,696846    | 5,39649 | <,0001* | 15,9738        | 14,4404  | 17,7391  |
| AM-base+NC/Palapress                             | AM-base+B/freeform plast      | 19,9500               | 3,696846    | 5,39649 | <,0001* | 14,0673        | 12,1836  | 16,7465  |
| AM-base+NC/Palapress                             | AM-base+B/primosplint         | 19,9500               | 3,696846    | 5,39649 | <,0001* | 16,9304        | 15,0017  | 19,5288  |
| AM-base+NC/Palapress                             | AM-base+B-PS/primosplint      | 19,9500               | 3,696846    | 5,39649 | <,0001* | 14,2506        | 12,2466  | 16,8935  |
| AM-base+NC/Palapress                             | AM-base+NC/freeform plast     | 19,9500               | 3,696846    | 5,39649 | <,0001* | 16,3477        | 14,4777  | 19,1457  |
| AM-base+NC/freeprint splint 2                    | AM-base+B/primosplint         | 19,8500               | 3,696846    | 5,36944 | <,0001* | 9,9253         | 7,9292   | 11,8088  |
| AM-base+NC/Palapress                             | AM-base+PS/primosplint        | 19,8500               | 3,696846    | 5,36944 | <,0001* | 15,7489        | 13,6227  | 18,0012  |
| AM-base+M/Palapress                              | AM-base+B-PS/primosplint      | 19,7500               | 3,696846    | 5,34239 | <,0001* | 12,6695        | 10,4615  | 15,1875  |
| AM-base+NC/freeprint splint 2                    | AM-base+NC/freeform plast     | 19,6500               | 3,696846    | 5,31534 | <,0001* | 9,6671         | 7,3914   | 11,2099  |
| AM-base+M/Palapress                              | AM-base+PS/primosplint        | 19,4500               | 3,696846    | 5,26124 | <,0001* | 13,5863        | 11,8634  | 16,3144  |
| AM-base+B/freeprint splint 2                     | AM-base+B/freeform plast      | 19,2500               | 3,696846    | 5,20714 | <,0001* | 8,5865         | 6,4378   | 10,8550  |
| AM-base+B/Palapress                              | AM-base+PS/primosplint        | 18,9500               | 3,696846    | 5,12599 | <,0001* | 11,8026        | 10,3378  | 13,8906  |
| AM-base+NC/Palapress                             | AM-base+B/freeform fixgel     | 18,7500               | 3,696846    | 5,07189 | <,0001* | 13,1159        | 10,1049  | 15,7424  |
| AM-base+NC/freeprint splint 2                    | AM-base+B-PS/primosplint      | 18,6500               | 3,696846    | 5,04484 | <,0001* | 7,2709         | 5,3790   | 8,9985   |
| AM-base+NC/freeprint splint 2                    | AM-base+B/freeform plast      | 18,4500               | 3,696846    | 4,99074 | <,0001* | 7,2481         | 4,9406   | 8,9435   |
| AM-base+NC/Palapress                             | AM-base+NC/freeform fixgel    | 18,4456               | 3,570783    | 5,16570 | <,0001* | 16,0105        | 14,0220  | 18,6941  |
| AM-base+NC/freeprint splint 2                    | AM-base+NC/freeform fixgel    | 18,1191               | 3,570783    | 5,07427 | <,0001* | 8,8882         | 6,8989   | 10,9619  |
| AM-base+M/Palapress                              | AM-base+B/freeform fixgel     | 17,9500               | 3,696846    | 4,85549 | <,0001* | 11,1347        | 8,4002   | 14,0475  |
| AM-base+NC/Palapress                             | AM-base+NC/freeprint splint 2 | 17,5500               | 3,696846    | 4,74729 | <,0001* | 7,3806         | 5,0066   | 9,5176   |
| AM-base+NC/freeprint splint 2                    | AM-base+PS/primosplint        | 17,1500               | 3,696846    | 4,63909 | <,0001* | 8,8337         | 7,1811   | 10,0853  |
| AM-base+B/Palapress                              | AM-base+B/freeform fixgel     | 16,7500               | 3,696846    | 4,53089 | <,0001* | 9,3122         | 6,6823   | 11,8575  |
| AM-base+BM/Palapress                             | AM-base+B/freeprint splint 2  | 16,4500               | 3,696846    | 4,44974 | <,0001* | 7,3101         | 5,1065   | 9,2449   |
| AM-base+BM/Palapress                             | AM-base+B/Palapress           | 16,1500               | 3,696846    | 4,36859 | <,0001* | 5,3740         | 3,5535   | 6,8657   |
| AM-base+NC/Palapress                             | AM-base+B/freeprint splint 2  | 14,1500               | 3,696846    | 3,82759 | 0,0001* | 5,6141         | 3,1610   | 8,1512   |
| AM-base+NC/freeprint splint 2                    | AM-base+B/freeform fixgel     | 12,7500               | 3,696846    | 3,44889 | 0,0006* | 5,7789         | 3,1268   | 8,1932   |
| AM-base+NC/Palapress                             | AM-base+B/Palapress           | 11,2500               | 3,696846    | 3,04314 | 0,0023* | 3,6950         | 1,4621   | 6,2344   |
| AM-base+B-PS/primosplint                         | AM-base+B/primosplint         | 10,1500               | 3,696846    | 2,74558 | 0,0060* | 2,7359         | 0,9816   | 4,1840   |

| Comparison of groups with dry storage (Table S3) |                              | Score Mean Difference | Std Err Dif | Z        | p-Value | Hodges-Lehmann | Lower CL | Upper CL |
|--------------------------------------------------|------------------------------|-----------------------|-------------|----------|---------|----------------|----------|----------|
| AM-base+M/Palapress                              | AM-base+B/freeprint splint 2 | 10,0500               | 3,696846    | 2,71853  | 0,0066* | 3,7523         | 1,1116   | 6,5329   |
| AM-base+BM/Palapress                             | AM-base+M/Palapress          | 9,5500                | 3,696846    | 2,58328  | 0,0098* | 3,3043         | 0,9007   | 5,5475   |
| AM-base+B/Palapress                              | AM-base+B/freeprint splint 2 | 6,4500                | 3,696846    | 1,74473  | 0,0810  | 1,9528         | -0,3087  | 4,1817   |
| AM-base+B-PS/primosplint                         | AM-base+PS/primosplint       | 6,2500                | 3,696846    | 1,69063  | 0,0909  | 1,1160         | -0,2073  | 2,8608   |
| AM-base+NC/Palapress                             | AM-base+M/Palapress          | 4,5500                | 3,696846    | 1,23078  | 0,2184  | 1,7916         | -0,9408  | 4,6878   |
| AM-base+NC/freeform fixgel                       | AM-base+B/primosplint        | 4,1897                | 3,570783    | 1,17333  | 0,2407  | 0,8823         | -0,7705  | 2,6354   |
| AM-base+B/freeform fixgel                        | AM-base+B/freeform plast     | 3,1500                | 3,696846    | 0,85208  | 0,3942  | 1,2554         | -1,0339  | 4,0715   |
| AM-base+NC/freeform plast                        | AM-base+B/primosplint        | 1,9500                | 3,696846    | 0,52748  | 0,5979  | 0,4394         | -1,2681  | 2,0206   |
| AM-base+B-PS/primosplint                         | AM-base+B/freeform plast     | 0,0500                | 3,696846    | 0,01353  | 0,9892  | 0,0070         | -1,9823  | 1,6287   |
| AM-base+NC/primosplint                           | AM-base+B/primosplint        | 0,0500                | 3,696846    | 0,01353  | 0,9892  | 0,0195         | -1,5663  | 1,5026   |
| AM-base+NC/freeform fixgel                       | AM-base+PS/primosplint       | -1,7956               | 3,570783    | -0,50286 | 0,6151  | -0,4067        | -2,0782  | 1,7713   |
| AM-base+NC/freeform plast                        | AM-base+NC/freeform fixgel   | -1,7956               | 3,570783    | -0,50286 | 0,6151  | -0,4156        | -2,4770  | 1,2118   |
| AM-base+NC/primosplint                           | AM-base+NC/freeform plast    | -1,8500               | 3,696846    | -0,50043 | 0,6168  | -0,5111        | -2,0237  | 1,3043   |
| AM-base+B-PS/primosplint                         | AM-base+B/freeform fixgel    | -4,1500               | 3,696846    | -1,12258 | 0,2616  | -1,5833        | -4,0055  | 1,0622   |
| AM-base+NC/primosplint                           | AM-base+NC/freeform fixgel   | -4,4074               | 3,570783    | -1,23428 | 0,2171  | -0,9631        | -2,6043  | 0,6518   |
| AM-base+NC/freeform plast                        | AM-base+PS/primosplint       | -5,2500               | 3,696846    | -1,42013 | 0,1556  | -1,1353        | -2,4229  | 0,7073   |
| AM-base+NC/freeprint splint 2                    | AM-base+B/freeprint splint 2 | -5,2500               | 3,696846    | -1,42013 | 0,1556  | -1,5261        | -3,9887  | 0,6495   |
| AM-base+B/primosplint                            | AM-base+PS/primosplint       | -5,3500               | 3,696846    | -1,44718 | 0,1478  | -1,3144        | -2,8825  | 0,5727   |
| AM-base+NC/Palapress                             | AM-base+BM/Palapress         | -5,6500               | 3,696846    | -1,52833 | 0,1264  | -1,8301        | -3,6412  | 0,8047   |
| AM-base+NC/primosplint                           | AM-base+PS/primosplint       | -5,6500               | 3,696846    | -1,52833 | 0,1264  | -1,1433        | -2,4393  | 0,3699   |
| AM-base+PS/primosplint                           | AM-base+B/freeform plast     | -6,3500               | 3,696846    | -1,71768 | 0,0859  | -1,3469        | -3,3729  | 0,3599   |
| AM-base+B/Palapress                              | AM-base+M/Palapress          | -6,3500               | 3,696846    | -1,71768 | 0,0859  | -1,8953        | -4,4111  | 0,6057   |
| AM-base+NC/freeform fixgel                       | AM-base+B/freeform plast     | -6,6926               | 3,570783    | -1,87428 | 0,0609  | -2,0067        | -3,8190  | 0,0670   |
| AM-base+NC/freeform fixgel                       | AM-base+B-PS/primosplint     | -6,8015               | 3,570783    | -1,90476 | 0,0568  | -1,7861        | -3,3463  | 0,2140   |
| AM-base+PS/primosplint                           | AM-base+B/freeform fixgel    | -8,3500               | 3,696846    | -2,25868 | 0,0239* | -2,6710        | -4,8777  | -0,2763  |
| AM-base+NC/freeform fixgel                       | AM-base+B/freeform fixgel    | -8,9779               | 3,570783    | -2,51428 | 0,0119* | -3,2395        | -5,8930  | -0,5809  |
| AM-base+NC/freeform plast                        | AM-base+B-PS/primosplint     | -9,1500               | 3,696846    | -2,47508 | 0,0133* | -2,2136        | -4,1095  | -0,6185  |
| AM-base+NC/freeform plast                        | AM-base+B/freeform plast     | -9,3500               | 3,696846    | -2,52918 | 0,0114* | -2,3236        | -4,1065  | -0,4941  |
| AM-base+B/primosplint                            | AM-base+B/freeform plast     | -10,1500              | 3,696846    | -2,74558 | 0,0060* | -2,7610        | -4,6041  | -1,0091  |
| AM-base+NC/freeform plast                        | AM-base+B/freeform fixgel    | -10,6500              | 3,696846    | -2,88083 | 0,0040* | -3,6233        | -6,3375  | -1,4428  |
| AM-base+BM/Palapress                             | PMMA-base+BM/Palapress       | -10,9500              | 3,696846    | -2,96198 | 0,0031* | -2,5307        | -4,2424  | -0,8453  |
| AM-base+NC/primosplint                           | AM-base+B-PS/primosplint     | -11,1500              | 3,696846    | -3,01608 | 0,0026* | -2,6192        | -4,1953  | -1,0007  |
| AM-base+NC/primosplint                           | AM-base+B/freeform plast     | -11,4500              | 3,696846    | -3,09724 | 0,0020* | -2,8271        | -4,5543  | -0,9617  |
| AM-base+NC/Palapress                             | PMMA-base+BM/Palapress       | -11,6500              | 3,696846    | -3,15134 | 0,0016* | -4,0275        | -6,1271  | -1,8821  |
| AM-base+B/primosplint                            | AM-base+B/freeform fixgel    | -12,2500              | 3,696846    | -3,31364 | 0,0009* | -4,1155        | -6,6312  | -1,6139  |
| AM-base+NC/primosplint                           | AM-base+B/freeform fixgel    | -13,0500              | 3,696846    | -3,53004 | 0,0004* | -3,9556        | -6,5442  | -1,7522  |
| AM-base+NC/freeprint splint 2                    | AM-base+B/Palapress          | -13,3500              | 3,696846    | -3,61119 | 0,0003* | -3,4901        | -5,3084  | -1,4927  |
| AM-base+M/Palapress                              | PMMA-base+BM/Palapress       | -14,6500              | 3,696846    | -3,96284 | <,0001* | -5,9248        | -8,1674  | -3,3501  |

| Comparison of groups with dry storage (Table S3) |                               | Score Mean Difference | Std Err Dif | Z        | p-Value | Hodges-Lehmann | Lower CL | Upper CL |
|--------------------------------------------------|-------------------------------|-----------------------|-------------|----------|---------|----------------|----------|----------|
| AM-base+NC/freeprint splint 2                    | AM-base+M/Palapress           | -14,6500              | 3,696846    | -3,96284 | <,0001* | -5,4910        | -8,0731  | -2,9713  |
| AM-base+B/freeform fixgel                        | AM-base+B/freeprint splint 2  | -14,9500              | 3,696846    | -4,04399 | <,0001* | -7,3956        | -9,9957  | -4,7099  |
| AM-base+PS/primosplint                           | AM-base+B/freeprint splint 2  | -18,0500              | 3,696846    | -4,88254 | <,0001* | -10,0195       | -12,2628 | -8,1662  |
| AM-base+NC/freeform fixgel                       | PMMA-base+BM/Palapress        | -18,4456              | 3,570783    | -5,16570 | <,0001* | -20,0717       | -22,0561 | -18,3633 |
| AM-base+NC/freeform fixgel                       | AM-base+B/freeprint splint 2  | -18,4456              | 3,570783    | -5,16570 | <,0001* | -10,4371       | -12,8887 | -8,4291  |
| AM-base+NC/freeform fixgel                       | AM-base+M/Palapress           | -18,4456              | 3,570783    | -5,16570 | <,0001* | -14,4261       | -16,9582 | -11,9059 |
| AM-base+NC/freeform fixgel                       | AM-base+B/Palapress           | -18,4456              | 3,570783    | -5,16570 | <,0001* | -12,3449       | -14,3124 | -10,6394 |
| AM-base+NC/freeform fixgel                       | AM-base+BM/Palapress          | -18,4456              | 3,570783    | -5,16570 | <,0001* | -17,7764       | -19,3947 | -15,9787 |
| AM-base+B/Palapress                              | PMMA-base+BM/Palapress        | -18,4500              | 3,696846    | -4,99074 | <,0001* | -7,8008        | -9,5209  | -6,0447  |
| AM-base+B/freeprint splint 2                     | PMMA-base+BM/Palapress        | -18,5500              | 3,696846    | -5,01779 | <,0001* | -9,7101        | -11,6603 | -7,5434  |
| AM-base+NC/freeprint splint 2                    | AM-base+BM/Palapress          | -18,6500              | 3,696846    | -5,04484 | <,0001* | -8,6643        | -10,5624 | -7,0271  |
| AM-base+B-PS/primosplint                         | AM-base+B/freeprint splint 2  | -18,9500              | 3,696846    | -5,12599 | <,0001* | -8,6973        | -11,2021 | -6,7966  |
| AM-base+NC/freeprint splint 2                    | PMMA-base+BM/Palapress        | -19,3500              | 3,696846    | -5,23419 | <,0001* | -11,2690       | -12,9680 | -9,5420  |
| AM-base+B/freeform plast                         | PMMA-base+BM/Palapress        | -19,9500              | 3,696846    | -5,39649 | <,0001* | -18,2734       | -20,2440 | -16,3741 |
| AM-base+B/freeform fixgel                        | PMMA-base+BM/Palapress        | -19,9500              | 3,696846    | -5,39649 | <,0001* | -17,2290       | -19,4488 | -14,4897 |
| AM-base+PS/primosplint                           | PMMA-base+BM/Palapress        | -19,9500              | 3,696846    | -5,39649 | <,0001* | -19,9279       | -21,4585 | -18,4859 |
| AM-base+B/primosplint                            | PMMA-base+BM/Palapress        | -19,9500              | 3,696846    | -5,39649 | <,0001* | -21,0441       | -22,8050 | -19,3412 |
| AM-base+B/primosplint                            | AM-base+B/freeprint splint 2  | -19,9500              | 3,696846    | -5,39649 | <,0001* | -11,3623       | -13,6935 | -9,4392  |
| AM-base+B-PS/primosplint                         | PMMA-base+BM/Palapress        | -19,9500              | 3,696846    | -5,39649 | <,0001* | -18,6153       | -20,3071 | -16,7788 |
| AM-base+NC/freeform plast                        | PMMA-base+BM/Palapress        | -19,9500              | 3,696846    | -5,39649 | <,0001* | -20,9047       | -22,6398 | -18,9966 |
| AM-base+NC/freeform plast                        | AM-base+B/freeprint splint 2  | -19,9500              | 3,696846    | -5,39649 | <,0001* | -10,9709       | -13,3216 | -8,8462  |
| AM-base+NC/freeform plast                        | AM-base+M/Palapress           | -19,9500              | 3,696846    | -5,39649 | <,0001* | -14,9944       | -17,2287 | -12,6613 |
| AM-base+NC/freeform plast                        | AM-base+B/Palapress           | -19,9500              | 3,696846    | -5,39649 | <,0001* | -12,9758       | -14,8520 | -11,1884 |
| AM-base+NC/freeform plast                        | AM-base+BM/Palapress          | -19,9500              | 3,696846    | -5,39649 | <,0001* | -18,3003       | -20,0534 | -16,6285 |
| AM-base+NC/primosplint                           | PMMA-base+BM/Palapress        | -19,9500              | 3,696846    | -5,39649 | <,0001* | -21,0364       | -22,6528 | -19,6907 |
| AM-base+NC/primosplint                           | AM-base+B/freeprint splint 2  | -19,9500              | 3,696846    | -5,39649 | <,0001* | -11,2605       | -13,5068 | -9,4853  |
| AM-base+NC/primosplint                           | AM-base+M/Palapress           | -19,9500              | 3,696846    | -5,39649 | <,0001* | -15,2868       | -17,8135 | -13,2109 |
| AM-base+NC/primosplint                           | AM-base+B/Palapress           | -19,9500              | 3,696846    | -5,39649 | <,0001* | -13,1806       | -15,0608 | -11,7396 |
| AM-base+NC/primosplint                           | AM-base+BM/Palapress          | -19,9500              | 3,696846    | -5,39649 | <,0001* | -18,7020       | -20,1093 | -17,1273 |
| AM-base+NC/primosplint                           | AM-base+NC/freeprint splint 2 | -19,9500              | 3,696846    | -5,39649 | <,0001* | -9,7783        | -11,4808 | -8,2642  |
| AM-base+NC/primosplint                           | AM-base+NC/Palapress          | -19,9500              | 3,696846    | -5,39649 | <,0001* | -16,8684       | -19,2838 | -15,1748 |

**Table S4 Non-parametric multiple comparison with Wilcoxon each pair test of the SBS distributions in the experimental groups with wet storage**

| Comparison of groups with wet storage (Table S4) |                               | Score Mean Difference | Std Err Dif | Z       | p-Value | Hodges-Lehmann | Lower CL | Upper CL |
|--------------------------------------------------|-------------------------------|-----------------------|-------------|---------|---------|----------------|----------|----------|
| AM-base+BM/Palapress                             | AM-base+B/freeprint splint 2  | 19,9500               | 3,696846    | 5,39649 | <,0001* | 9,8369         | 7,8887   | 12,1553  |
| AM-base+BM/Palapress                             | AM-base+PS/primosplint        | 19,9500               | 3,696846    | 5,39649 | <,0001* | 10,7204        | 9,2728   | 13,2993  |
| AM-base+BM/Palapress                             | AM-base+B/primosplint         | 19,9500               | 3,696846    | 5,39649 | <,0001* | 10,9332        | 9,2196   | 13,5478  |
| AM-base+BM/Palapress                             | AM-base+B-PS/primosplint      | 19,9500               | 3,696846    | 5,39649 | <,0001* | 12,0819        | 9,9707   | 14,5412  |
| AM-base+BM/Palapress                             | AM-base+B/freeform plast      | 19,8500               | 3,696846    | 5,36944 | <,0001* | 9,3882         | 7,6943   | 12,0306  |
| AM-base+BM/Palapress                             | AM-base+FB/freeform plast     | 19,8500               | 3,696846    | 5,36944 | <,0001* | 10,6962        | 8,8027   | 13,3010  |
| AM-base+B/Palapress                              | AM-base+B/primosplint         | 19,6500               | 3,696846    | 5,31534 | <,0001* | 6,3670         | 4,9601   | 8,7276   |
| AM-base+B/Palapress                              | AM-base+B-PS/primosplint      | 19,5500               | 3,696846    | 5,28829 | <,0001* | 7,6569         | 5,8068   | 10,3982  |
| AM-base+NC/Palapress                             | AM-base+NC/freeform plast     | 19,4487               | 3,652685    | 5,32449 | <,0001* | 20,0296        | 17,8199  | 21,6695  |
| AM-base+B/Palapress                              | AM-base+PS/primosplint        | 19,2500               | 3,696846    | 5,20714 | <,0001* | 6,6123         | 4,9018   | 8,5942   |
| AM-base+NC/Palapress                             | AM-base+B/primosplint         | 19,1408               | 3,652685    | 5,24020 | <,0001* | 16,1580        | 13,8915  | 18,2965  |
| AM-base+NC/Palapress                             | AM-base+B-PS/primosplint      | 19,1408               | 3,652685    | 5,24020 | <,0001* | 17,1218        | 14,7142  | 19,3014  |
| AM-base+NC/Palapress                             | AM-base+NC/freeprint splint 2 | 19,1408               | 3,652685    | 5,24020 | <,0001* | 18,0175        | 14,9025  | 20,3822  |
| AM-base+B/freeform fixgel                        | AM-base+B/freeprint splint 2  | 19,0500               | 3,696846    | 5,15304 | <,0001* | 5,6531         | 4,0930   | 7,0105   |
| AM-base+NC/Palapress                             | AM-base+FB/freeform plast     | 18,9355               | 3,652685    | 5,18400 | <,0001* | 15,5076        | 13,3679  | 18,0461  |
| AM-base+NC/Palapress                             | AM-base+PS/primosplint        | 18,9355               | 3,652685    | 5,18400 | <,0001* | 16,0143        | 14,0691  | 18,2468  |
| AM-base+B/freeform fixgel                        | AM-base+FB/freeform plast     | 18,5500               | 3,696846    | 5,01779 | <,0001* | 6,3902         | 4,5785   | 8,1423   |
| AM-base+B/Palapress                              | AM-base+B/freeprint splint 2  | 18,5500               | 3,696846    | 5,01779 | <,0001* | 5,3326         | 3,8539   | 7,2784   |
| AM-base+NC/Palapress                             | AM-base+B/freeform plast      | 18,5250               | 3,652685    | 5,07161 | <,0001* | 14,4621        | 12,2078  | 16,7512  |
| AM-base+NC/Palapress                             | AM-base+B/freeprint splint 2  | 18,4224               | 3,652685    | 5,04351 | <,0001* | 15,0582        | 12,7735  | 16,8896  |
| AM-base+B/Palapress                              | AM-base+FB/freeform plast     | 18,3500               | 3,696846    | 4,96369 | <,0001* | 6,2576         | 4,4126   | 8,6586   |
| AM-base+NC/Palapress                             | AM-base+NC/freeform fixgel    | 18,3197               | 3,652685    | 5,01542 | <,0001* | 15,2350        | 12,6371  | 17,4491  |
| AM-base+B-FB/freeform plast                      | AM-base+FB/freeform plast     | 18,2500               | 3,696846    | 4,93664 | <,0001* | 7,1447         | 5,1031   | 9,6762   |
| AM-base+NC/Palapress                             | AM-base+B-FB/freeform fixgel  | 17,8066               | 3,652685    | 4,87493 | <,0001* | 12,8557        | 9,5459   | 15,0506  |
| AM-base+FB/freeform fixgel                       | AM-base+FB/freeform plast     | 17,6500               | 3,696846    | 4,77434 | <,0001* | 6,7338         | 4,5526   | 9,0237   |
| AM-base+FB/freeform fixgel                       | AM-base+B/freeprint splint 2  | 17,6500               | 3,696846    | 4,77434 | <,0001* | 6,1768         | 4,0505   | 7,8755   |
| AM-base+BM/Palapress                             | AM-base+B-FB/freeform fixgel  | 17,3500               | 3,696846    | 4,69319 | <,0001* | 7,7566         | 5,5534   | 10,2519  |
| AM-base+B-FB/freeform plast                      | AM-base+B/freeform plast      | 17,2500               | 3,696846    | 4,66614 | <,0001* | 5,9296         | 3,9044   | 8,3708   |
| AM-base+B/freeform fixgel                        | AM-base+B/freeform plast      | 17,2500               | 3,696846    | 4,66614 | <,0001* | 5,1604         | 3,4304   | 6,8904   |
| AM-base+B/Palapress                              | AM-base+B/freeform plast      | 17,1500               | 3,696846    | 4,63909 | <,0001* | 5,1048         | 3,2197   | 7,1464   |
| AM-base+NC/Palapress                             | AM-base+FB/freeform fixgel    | 16,1645               | 3,652685    | 4,42537 | <,0001* | 9,0820         | 5,8514   | 11,7996  |
| AM-base+NC/Palapress                             | AM-base+B/freeform fixgel     | 16,1645               | 3,652685    | 4,42537 | <,0001* | 9,4769         | 6,6787   | 11,7289  |
| AM-base+FB/freeform fixgel                       | AM-base+B/freeform plast      | 16,0500               | 3,696846    | 4,34154 | <,0001* | 5,6516         | 3,3400   | 7,8430   |
| AM-base+NC/Palapress                             | AM-base+M/Palapress           | 15,6330               | 3,560327    | 4,39090 | <,0001* | 11,4154        | 6,8251   | 15,0101  |

| Comparison of groups with wet storage (Table S4) |                              | Score Mean Difference | Std Err Dif | Z        | p-Value | Hodges-Lehmann | Lower CL | Upper CL |
|--------------------------------------------------|------------------------------|-----------------------|-------------|----------|---------|----------------|----------|----------|
| AM-base+NC/Palapress                             | AM-base+B-FB/freeform plast  | 14,3171               | 3,652685    | 3,91961  | <,0001* | 8,3835         | 4,8386   | 11,2620  |
| AM-base+BM/Palapress                             | AM-base+B/freeform fixgel    | 13,5500               | 3,696846    | 3,66529  | 0,0002* | 4,5589         | 2,0992   | 6,8951   |
| AM-base+M/Palapress                              | AM-base+B-PS/primosplint     | 13,1417               | 3,610556    | 3,63979  | 0,0003* | 5,6345         | 2,5059   | 8,9464   |
| AM-base+BM/Palapress                             | AM-base+M/Palapress          | 12,6139               | 3,610556    | 3,49361  | 0,0005* | 6,9363         | 3,2656   | 10,3574  |
| AM-base+B-FB/freeform fixgel                     | AM-base+FB/freeform plast    | 12,4500               | 3,696846    | 3,36774  | 0,0008* | 2,8715         | 1,2471   | 4,6626   |
| AM-base+BM/Palapress                             | AM-base+FB/freeform fixgel   | 11,5500               | 3,696846    | 3,12429  | 0,0018* | 4,3033         | 1,4849   | 7,5404   |
| AM-base+B/Palapress                              | AM-base+B-FB/freeform fixgel | 11,2500               | 3,696846    | 3,04314  | 0,0023* | 3,5171         | 1,4453   | 5,8061   |
| AM-base+M/Palapress                              | AM-base+PS/primosplint       | 11,2417               | 3,610556    | 3,11356  | 0,0018* | 4,2830         | 1,7635   | 7,6873   |
| AM-base+NC/Palapress                             | AM-base+B/Palapress          | 11,1355               | 3,652685    | 3,04859  | 0,0023* | 8,9186         | 4,3681   | 11,5250  |
| AM-base+M/Palapress                              | AM-base+B/primosplint        | 10,9250               | 3,610556    | 3,02585  | 0,0025* | 4,4986         | 1,6387   | 7,9209   |
| AM-base+M/Palapress                              | AM-base+FB/freeform plast    | 9,9750                | 3,610556    | 2,76273  | 0,0057* | 3,8915         | 1,2561   | 7,4325   |
| AM-base+B-FB/freeform fixgel                     | AM-base+B/freeprint splint 2 | 9,9500                | 3,696846    | 2,69148  | 0,0071* | 1,9925         | 0,5721   | 3,6764   |
| AM-base+BM/Palapress                             | AM-base+B/Palapress          | 9,8500                | 3,696846    | 2,66443  | 0,0077* | 4,1740         | 1,5120   | 6,5656   |
| AM-base+BM/Palapress                             | AM-base+B-FB/freeform plast  | 9,5500                | 3,696846    | 2,58328  | 0,0098* | 3,7792         | 0,8392   | 6,5654   |
| AM-base+NC/Palapress                             | AM-base+BM/Palapress         | 9,3908                | 3,652685    | 2,57093  | 0,0101* | 4,6465         | 0,8696   | 7,7198   |
| AM-base+NC/freeform fixgel                       | AM-base+B-PS/primosplint     | 8,4500                | 3,696846    | 2,28573  | 0,0223* | 2,0815         | 0,3314   | 3,4627   |
| AM-base+M/Palapress                              | AM-base+B/freeprint splint 2 | 8,2861                | 3,610556    | 2,29497  | 0,0217* | 3,3133         | 0,3469   | 6,6272   |
| AM-base+NC/freeprint splint 2                    | AM-base+NC/freeform plast    | 7,9500                | 3,696846    | 2,15048  | 0,0315* | 2,0111         | 0,0962   | 3,3564   |
| AM-base+B-FB/freeform fixgel                     | AM-base+B/freeform plast     | 7,7500                | 3,696846    | 2,09638  | 0,0360* | 1,5970         | 0,1950   | 3,3082   |
| AM-base+M/Palapress                              | AM-base+B/freeform plast     | 7,6528                | 3,610556    | 2,11956  | 0,0340* | 2,7425         | 0,1197   | 6,1725   |
| AM-base+B/Palapress                              | AM-base+M/Palapress          | 6,3861                | 3,610556    | 1,76873  | 0,0769  | 2,9512         | -0,4643  | 6,7093   |
| AM-base+NC/freeform fixgel                       | AM-base+B/primosplint        | 5,4500                | 3,696846    | 1,47423  | 0,1404  | 0,9615         | -0,3123  | 2,5409   |
| AM-base+B/freeprint splint 2                     | AM-base+FB/freeform plast    | 5,1500                | 3,696846    | 1,39308  | 0,1636  | 0,8651         | -0,5104  | 2,0667   |
| AM-base+NC/freeform fixgel                       | AM-base+PS/primosplint       | 4,7500                | 3,696846    | 1,28488  | 0,1988  | 1,1119         | -0,4323  | 2,5002   |
| AM-base+NC/freeform fixgel                       | AM-base+FB/freeform plast    | 2,3500                | 3,696846    | 0,63568  | 0,5250  | 0,6374         | -0,9538  | 2,3262   |
| AM-base+M/Palapress                              | AM-base+B-FB/freeform fixgel | 2,1639                | 3,610556    | 0,59932  | 0,5490  | 1,0204         | -2,0883  | 4,4217   |
| AM-base+B/primosplint                            | AM-base+PS/primosplint       | 0,1500                | 3,696846    | 0,04058  | 0,9676  | 0,0206         | -1,1177  | 1,1825   |
| AM-base+B/Palapress                              | AM-base+B/freeform fixgel    | 0,0000                | 3,696846    | 0,00000  | 1,0000  | 0,0072         | -1,8714  | 3,1551   |
| AM-base+NC/freeform fixgel                       | AM-base+B/freeprint splint 2 | 0,0000                | 3,696846    | 0,00000  | 1,0000  | 0,0005592      | -1,4880  | 1,2070   |
| AM-base+B/Palapress                              | AM-base+FB/freeform fixgel   | -0,3500               | 3,696846    | -0,09468 | 0,9246  | -0,1469        | -2,6567  | 3,6546   |
| AM-base+NC/Palapress                             | PMMA-base+BM/Palapress       | -0,5645               | 3,652685    | -0,15454 | 0,8772  | -0,1983        | -2,5511  | 1,7233   |
| AM-base+B/Palapress                              | AM-base+B-FB/freeform plast  | -1,5500               | 3,696846    | -0,41928 | 0,6750  | -0,5084        | -3,3863  | 2,4409   |
| AM-base+PS/primosplint                           | AM-base+FB/freeform plast    | -1,6500               | 3,696846    | -0,44633 | 0,6554  | -0,3386        | -1,5654  | 0,9497   |
| AM-base+B/freeform fixgel                        | AM-base+FB/freeform fixgel   | -1,8500               | 3,696846    | -0,50043 | 0,6168  | -0,5043        | -2,6250  | 2,0145   |
| AM-base+B/primosplint                            | AM-base+FB/freeform plast    | -1,8500               | 3,696846    | -0,50043 | 0,6168  | -0,2466        | -1,6746  | 0,9426   |
| AM-base+FB/freeform fixgel                       | AM-base+B-FB/freeform plast  | -2,0500               | 3,696846    | -0,55453 | 0,5792  | -0,6190        | -3,4422  | 1,9753   |
| AM-base+B/freeprint splint 2                     | AM-base+B/freeform plast     | -2,4500               | 3,696846    | -0,66273 | 0,5075  | -0,3077        | -1,6694  | 0,8412   |
| AM-base+NC/freeform fixgel                       | AM-base+B/freeform plast     | -2,5500               | 3,696846    | -0,68978 | 0,4903  | -0,6047        | -2,1334  | 1,1386   |

| Comparison of groups with wet storage (Table S4) |                               | Score Mean Difference | Std Err Dif | Z        | p-Value | Hodges-Lehmann | Lower CL | Upper CL |
|--------------------------------------------------|-------------------------------|-----------------------|-------------|----------|---------|----------------|----------|----------|
| AM-base+B/freeform fixgel                        | AM-base+B-FB/freeform plast   | -3,1500               | 3,696846    | -0,85208 | 0,3942  | -1,1085        | -3,4328  | 1,4004   |
| AM-base+NC/freeprint splint 2                    | AM-base+B-PS/primosplint      | -3,4500               | 3,696846    | -0,93323 | 0,3507  | -0,7383        | -2,6827  | 0,9543   |
| AM-base+B-PS/primosplint                         | AM-base+PS/primosplint        | -4,8500               | 3,696846    | -1,31193 | 0,1895  | -0,9520        | -2,3007  | 0,4057   |
| AM-base+B-PS/primosplint                         | AM-base+B/primosplint         | -4,8500               | 3,696846    | -1,31193 | 0,1895  | -1,0026        | -2,3589  | 0,4344   |
| AM-base+M/Palapress                              | AM-base+B/freeform fixgel     | -5,2250               | 3,610556    | -1,44715 | 0,1479  | -2,0846        | -5,1948  | 1,2712   |
| AM-base+M/Palapress                              | AM-base+FB/freeform fixgel    | -5,3306               | 3,610556    | -1,47638 | 0,1398  | -2,2465        | -6,0085  | 1,1816   |
| AM-base+NC/primosplint                           | AM-base+NC/freeform plast     | -5,5500               | 3,696846    | -1,50128 | 0,1333  | -0,7487        | -1,4591  | 0,2425   |
| AM-base+FB/freeform plast                        | AM-base+B/freeform plast      | -6,1500               | 3,696846    | -1,66358 | 0,0962  | -1,2553        | -2,5446  | 0,2621   |
| AM-base+B-PS/primosplint                         | AM-base+FB/freeform plast     | -6,2500               | 3,696846    | -1,69063 | 0,0909  | -1,2306        | -2,8353  | 0,1450   |
| AM-base+M/Palapress                              | AM-base+B-FB/freeform plast   | -6,5972               | 3,610556    | -1,82720 | 0,0677  | -3,1422        | -6,5416  | 0,3554   |
| AM-base+NC/freeprint splint 2                    | AM-base+B/primosplint         | -6,8500               | 3,696846    | -1,85293 | 0,0639  | -1,8851        | -3,2954  | 0,0845   |
| AM-base+PS/primosplint                           | AM-base+B/freeprint splint 2  | -7,3500               | 3,696846    | -1,98818 | 0,0468* | -1,1877        | -2,2638  | -0,0399  |
| AM-base+B/primosplint                            | AM-base+B/freeprint splint 2  | -7,7500               | 3,696846    | -2,09638 | 0,0360* | -1,0685        | -2,3222  | -0,1095  |
| AM-base+NC/freeprint splint 2                    | AM-base+PS/primosplint        | -7,8500               | 3,696846    | -2,12343 | 0,0337* | -2,0146        | -3,4465  | -0,1103  |
| AM-base+NC/freeprint splint 2                    | AM-base+FB/freeform plast     | -8,0500               | 3,696846    | -2,17753 | 0,0294* | -2,2279        | -3,8076  | -0,2982  |
| AM-base+B/primosplint                            | AM-base+B/freeform plast      | -8,3500               | 3,696846    | -2,25868 | 0,0239* | -1,5658        | -2,7194  | -0,3561  |
| AM-base+NC/freeform fixgel                       | AM-base+M/Palapress           | -8,3917               | 3,610556    | -2,32420 | 0,0201* | -3,6617        | -7,3608  | -0,5333  |
| AM-base+NC/freeform fixgel                       | AM-base+B-FB/freeform fixgel  | -8,8500               | 3,696846    | -2,39393 | 0,0167* | -2,3140        | -4,3965  | -0,5798  |
| AM-base+NC/freeprint splint 2                    | AM-base+NC/freeform fixgel    | -9,7500               | 3,696846    | -2,63738 | 0,0084* | -2,7351        | -4,3317  | -0,7561  |
| AM-base+PS/primosplint                           | AM-base+B/freeform plast      | -9,8500               | 3,696846    | -2,66443 | 0,0077* | -1,5948        | -2,6856  | -0,3052  |
| AM-base+B-FB/freeform fixgel                     | AM-base+FB/freeform fixgel    | -10,3500              | 3,696846    | -2,79968 | 0,0051* | -3,6166        | -6,0922  | -1,1224  |
| AM-base+B-FB/freeform fixgel                     | AM-base+B/freeform fixgel     | -10,5500              | 3,696846    | -2,85378 | 0,0043* | -3,4737        | -5,2856  | -1,3851  |
| AM-base+NC/primosplint                           | AM-base+NC/freeprint splint 2 | -11,1500              | 3,696846    | -3,01608 | 0,0026* | -2,4897        | -4,2852  | -0,7636  |
| AM-base+NC/freeprint splint 2                    | AM-base+B/freeprint splint 2  | -11,4500              | 3,696846    | -3,09724 | 0,0020* | -2,8921        | -4,5151  | -1,2905  |
| AM-base+B-PS/primosplint                         | AM-base+B/freeprint splint 2  | -11,6500              | 3,696846    | -3,15134 | 0,0016* | -2,0966        | -3,2653  | -0,8713  |
| AM-base+B-FB/freeform fixgel                     | AM-base+B-FB/freeform plast   | -11,7500              | 3,696846    | -3,17839 | 0,0015* | -4,2940        | -6,7412  | -1,8631  |
| AM-base+BM/Palapress                             | PMMA-base+BM/Palapress        | -12,1500              | 3,696846    | -3,28659 | 0,0010* | -5,1351        | -7,4134  | -2,9724  |
| AM-base+B/Palapress                              | PMMA-base+BM/Palapress        | -12,7500              | 3,696846    | -3,44889 | 0,0006* | -9,7107        | -11,5005 | -7,1008  |
| AM-base+B-PS/primosplint                         | AM-base+B/freeform plast      | -12,8500              | 3,696846    | -3,47594 | 0,0005* | -2,4730        | -3,9866  | -1,0980  |
| AM-base+NC/freeprint splint 2                    | AM-base+M/Palapress           | -13,2472              | 3,610556    | -3,66903 | 0,0002* | -6,4575        | -9,8007  | -3,1648  |
| AM-base+NC/freeprint splint 2                    | AM-base+B/freeform plast      | -13,2500              | 3,696846    | -3,58414 | 0,0003* | -3,4421        | -4,9909  | -1,4898  |
| AM-base+PS/primosplint                           | AM-base+B-FB/freeform fixgel  | -14,3500              | 3,696846    | -3,88169 | 0,0001* | -3,1542        | -4,8680  | -1,6398  |
| AM-base+NC/freeform plast                        | AM-base+B-PS/primosplint      | -14,4500              | 3,696846    | -3,90874 | <,0001* | -2,8545        | -3,8575  | -1,8816  |
| AM-base+B/primosplint                            | AM-base+B-FB/freeform fixgel  | -14,7500              | 3,696846    | -3,98989 | <,0001* | -3,1285        | -4,9566  | -1,7930  |
| AM-base+NC/primosplint                           | AM-base+B-PS/primosplint      | -15,2500              | 3,696846    | -4,12514 | <,0001* | -3,4078        | -4,6381  | -2,0176  |
| AM-base+NC/freeprint splint 2                    | AM-base+B-FB/freeform fixgel  | -16,0500              | 3,696846    | -4,34154 | <,0001* | -5,2559        | -7,1914  | -3,2824  |
| AM-base+B-PS/primosplint                         | AM-base+B-FB/freeform fixgel  | -16,2500              | 3,696846    | -4,39564 | <,0001* | -4,2412        | -6,1011  | -2,6034  |
| AM-base+NC/freeform plast                        | AM-base+M/Palapress           | -16,9417              | 3,610556    | -4,69226 | <,0001* | -8,3018        | -11,2487 | -5,3229  |

| Comparison of groups with wet storage (Table S4) |                              | Score Mean Difference | Std Err Dif | Z        | p-Value | Hodges-Lehmann | Lower CL | Upper CL |
|--------------------------------------------------|------------------------------|-----------------------|-------------|----------|---------|----------------|----------|----------|
| AM-base+NC/freeform fixgel                       | AM-base+FB/freeform fixgel   | -17,2500              | 3,696846    | -4,66614 | <,0001* | -6,0985        | -8,3402  | -4,3822  |
| AM-base+B-FB/freeform plast                      | PMMA-base+BM/Palapress       | -17,4500              | 3,696846    | -4,72024 | <,0001* | -8,6830        | -10,8906 | -6,2316  |
| AM-base+NC/primosplint                           | AM-base+M/Palapress          | -17,6806              | 3,610556    | -4,89691 | <,0001* | -8,7887        | -12,0533 | -6,0347  |
| AM-base+NC/freeform fixgel                       | AM-base+B-FB/freeform plast  | -17,9500              | 3,696846    | -4,85549 | <,0001* | -6,7896        | -9,3213  | -4,4295  |
| AM-base+NC/freeform fixgel                       | AM-base+B/freeform fixgel    | -18,1500              | 3,696846    | -4,90959 | <,0001* | -5,6312        | -7,4990  | -4,0624  |
| AM-base+NC/freeform fixgel                       | AM-base+B/Palapress          | -18,1500              | 3,696846    | -4,90959 | <,0001* | -5,4196        | -8,8179  | -3,8742  |
| AM-base+M/Palapress                              | PMMA-base+BM/Palapress       | -18,3139              | 3,610556    | -5,07232 | <,0001* | -11,8228       | -14,8649 | -8,2936  |
| AM-base+NC/primosplint                           | AM-base+NC/freeform fixgel   | -18,3500              | 3,696846    | -4,96369 | <,0001* | -5,4000        | -6,8439  | -3,6748  |
| AM-base+B/freeprint splint 2                     | AM-base+B-FB/freeform plast  | -18,4500              | 3,696846    | -4,99074 | <,0001* | -6,4791        | -8,7695  | -4,3453  |
| AM-base+NC/primosplint                           | AM-base+B/primosplint        | -18,4500              | 3,696846    | -4,99074 | <,0001* | -4,2446        | -5,5003  | -3,2498  |
| AM-base+B/primosplint                            | AM-base+FB/freeform fixgel   | -18,8500              | 3,696846    | -5,09894 | <,0001* | -7,1219        | -9,3865  | -5,1902  |
| AM-base+NC/primosplint                           | AM-base+FB/freeform plast    | -18,8500              | 3,696846    | -5,09894 | <,0001* | -4,4449        | -5,8942  | -3,4676  |
| AM-base+NC/primosplint                           | AM-base+PS/primosplint       | -18,8500              | 3,696846    | -5,09894 | <,0001* | -4,3277        | -5,3121  | -3,2730  |
| AM-base+PS/primosplint                           | AM-base+FB/freeform fixgel   | -18,9500              | 3,696846    | -5,12599 | <,0001* | -7,2627        | -9,2427  | -5,0502  |
| AM-base+NC/freeform plast                        | AM-base+NC/freeform fixgel   | -18,9500              | 3,696846    | -5,12599 | <,0001* | -5,2239        | -6,0642  | -3,3439  |
| AM-base+NC/freeprint splint 2                    | AM-base+FB/freeform fixgel   | -19,0500              | 3,696846    | -5,15304 | <,0001* | -8,8405        | -10,9127 | -6,5951  |
| AM-base+B/primosplint                            | AM-base+B-FB/freeform plast  | -19,1500              | 3,696846    | -5,18009 | <,0001* | -7,4960        | -9,9939  | -5,4425  |
| AM-base+PS/primosplint                           | AM-base+B-FB/freeform plast  | -19,2500              | 3,696846    | -5,20714 | <,0001* | -7,4853        | -9,9583  | -5,6113  |
| AM-base+B-PS/primosplint                         | AM-base+FB/freeform fixgel   | -19,2500              | 3,696846    | -5,20714 | <,0001* | -8,2838        | -10,0989 | -5,9878  |
| AM-base+NC/freeprint splint 2                    | AM-base+B/freeform fixgel    | -19,2500              | 3,696846    | -5,20714 | <,0001* | -8,3885        | -10,4596 | -6,5422  |
| AM-base+NC/freeprint splint 2                    | AM-base+B/Palapress          | -19,2500              | 3,696846    | -5,20714 | <,0001* | -8,6215        | -11,5023 | -6,4862  |
| AM-base+NC/freeprint splint 2                    | AM-base+B-FB/freeform plast  | -19,3500              | 3,696846    | -5,23419 | <,0001* | -9,3882        | -12,0491 | -6,9805  |
| AM-base+NC/primosplint                           | AM-base+NC/Palapress         | -19,4487              | 3,652685    | -5,32449 | <,0001* | -20,4958       | -22,4972 | -18,2266 |
| AM-base+B/freeform fixgel                        | PMMA-base+BM/Palapress       | -19,4500              | 3,696846    | -5,26124 | <,0001* | -9,7567        | -11,1787 | -7,9956  |
| AM-base+PS/primosplint                           | AM-base+B/freeform fixgel    | -19,4500              | 3,696846    | -5,26124 | <,0001* | -6,7449        | -8,3178  | -5,0804  |
| AM-base+NC/freeform plast                        | AM-base+B/primosplint        | -19,4500              | 3,696846    | -5,26124 | <,0001* | -3,7682        | -4,9305  | -2,6182  |
| AM-base+B-PS/primosplint                         | AM-base+B-FB/freeform plast  | -19,5500              | 3,696846    | -5,28829 | <,0001* | -8,6973        | -11,2173 | -6,3782  |
| AM-base+NC/freeform plast                        | AM-base+FB/freeform plast    | -19,5500              | 3,696846    | -5,28829 | <,0001* | -3,9840        | -5,1593  | -2,8172  |
| AM-base+FB/freeform fixgel                       | PMMA-base+BM/Palapress       | -19,6500              | 3,696846    | -5,31534 | <,0001* | -9,1059        | -11,3156 | -7,3201  |
| AM-base+B/primosplint                            | AM-base+B/freeform fixgel    | -19,6500              | 3,696846    | -5,31534 | <,0001* | -6,6907        | -8,2713  | -5,0316  |
| AM-base+B-PS/primosplint                         | AM-base+B/freeform fixgel    | -19,7500              | 3,696846    | -5,34239 | <,0001* | -7,7014        | -9,3246  | -6,0785  |
| AM-base+NC/freeform plast                        | AM-base+PS/primosplint       | -19,7500              | 3,696846    | -5,34239 | <,0001* | -3,6395        | -4,5830  | -2,7236  |
| AM-base+NC/primosplint                           | AM-base+B/freeprint splint 2 | -19,7500              | 3,696846    | -5,34239 | <,0001* | -5,4508        | -6,5636  | -4,5557  |
| AM-base+NC/primosplint                           | AM-base+B/freeform plast     | -19,8500              | 3,696846    | -5,36944 | <,0001* | -5,7443        | -7,0582  | -4,7319  |
| AM-base+B/freeform plast                         | PMMA-base+BM/Palapress       | -19,9500              | 3,696846    | -5,39649 | <,0001* | -14,8561       | -16,3218 | -13,4641 |
| AM-base+FB/freeform plast                        | PMMA-base+BM/Palapress       | -19,9500              | 3,696846    | -5,39649 | <,0001* | -16,0274       | -17,6152 | -14,6463 |
| AM-base+B/freeprint splint 2                     | PMMA-base+BM/Palapress       | -19,9500              | 3,696846    | -5,39649 | <,0001* | -15,2130       | -16,5071 | -14,2435 |
| AM-base+B-FB/freeform fixgel                     | PMMA-base+BM/Palapress       | -19,9500              | 3,696846    | -5,39649 | <,0001* | -13,1111       | -14,8396 | -11,3273 |

| Comparison of groups with wet storage (Table S4) |                              | Score Mean Difference | Std Err Dif | Z        | p-Value | Hodges-Lehmann | Lower CL | Upper CL |
|--------------------------------------------------|------------------------------|-----------------------|-------------|----------|---------|----------------|----------|----------|
| AM-base+PS/primosplint                           | PMMA-base+BM/Palapress       | -19,9500              | 3,696846    | -5,39649 | <,0001* | -16,5252       | -17,7564 | -15,0420 |
| AM-base+B/primosplint                            | PMMA-base+BM/Palapress       | -19,9500              | 3,696846    | -5,39649 | <,0001* | -16,3040       | -17,8118 | -15,1960 |
| AM-base+B-PS/primosplint                         | PMMA-base+BM/Palapress       | -19,9500              | 3,696846    | -5,39649 | <,0001* | -17,3826       | -18,7205 | -16,0075 |
| AM-base+NC/freeform fixgel                       | PMMA-base+BM/Palapress       | -19,9500              | 3,696846    | -5,39649 | <,0001* | -15,2437       | -16,8393 | -14,1040 |
| AM-base+NC/freeform fixgel                       | AM-base+BM/Palapress         | -19,9500              | 3,696846    | -5,39649 | <,0001* | -10,2872       | -13,0078 | -7,7612  |
| AM-base+NC/freeform plast                        | PMMA-base+BM/Palapress       | -19,9500              | 3,696846    | -5,39649 | <,0001* | -20,3019       | -21,1516 | -19,4259 |
| AM-base+NC/freeform plast                        | AM-base+B/freeform plast     | -19,9500              | 3,696846    | -5,39649 | <,0001* | -5,0826        | -6,3100  | -4,1117  |
| AM-base+NC/freeform plast                        | AM-base+B-FB/freeform plast  | -19,9500              | 3,696846    | -5,39649 | <,0001* | -11,3246       | -13,2302 | -9,3616  |
| AM-base+NC/freeform plast                        | AM-base+B/freeprint splint 2 | -19,9500              | 3,696846    | -5,39649 | <,0001* | -5,0386        | -5,7142  | -4,1776  |
| AM-base+NC/freeform plast                        | AM-base+FB/freeform fixgel   | -19,9500              | 3,696846    | -5,39649 | <,0001* | -11,4332       | -12,5788 | -8,5434  |
| AM-base+NC/freeform plast                        | AM-base+B/freeform fixgel    | -19,9500              | 3,696846    | -5,39649 | <,0001* | -10,5157       | -11,7773 | -9,1099  |
| AM-base+NC/freeform plast                        | AM-base+B-FB/freeform fixgel | -19,9500              | 3,696846    | -5,39649 | <,0001* | -6,8542        | -8,2843  | -5,4292  |
| AM-base+NC/freeform plast                        | AM-base+B/Palapress          | -19,9500              | 3,696846    | -5,39649 | <,0001* | -10,2759       | -11,5291 | -8,8156  |
| AM-base+NC/freeform plast                        | AM-base+BM/Palapress         | -19,9500              | 3,696846    | -5,39649 | <,0001* | -14,4813       | -16,6215 | -12,8320 |
| AM-base+NC/freeprint splint 2                    | PMMA-base+BM/Palapress       | -19,9500              | 3,696846    | -5,39649 | <,0001* | -18,1477       | -19,9559 | -16,5825 |
| AM-base+NC/freeprint splint 2                    | AM-base+BM/Palapress         | -19,9500              | 3,696846    | -5,39649 | <,0001* | -13,1067       | -15,6039 | -10,4922 |
| AM-base+NC/primosplint                           | PMMA-base+BM/Palapress       | -19,9500              | 3,696846    | -5,39649 | <,0001* | -20,8838       | -21,9776 | -19,4773 |
| AM-base+NC/primosplint                           | AM-base+B-FB/freeform plast  | -19,9500              | 3,696846    | -5,39649 | <,0001* | -11,7503       | -14,1717 | -9,7395  |
| AM-base+NC/primosplint                           | AM-base+FB/freeform fixgel   | -19,9500              | 3,696846    | -5,39649 | <,0001* | -11,6673       | -13,4455 | -9,1721  |
| AM-base+NC/primosplint                           | AM-base+B/freeform fixgel    | -19,9500              | 3,696846    | -5,39649 | <,0001* | -11,0565       | -12,4358 | -9,3088  |
| AM-base+NC/primosplint                           | AM-base+B-FB/freeform fixgel | -19,9500              | 3,696846    | -5,39649 | <,0001* | -7,4270        | -9,0537  | -6,0722  |
| AM-base+NC/primosplint                           | AM-base+B/Palapress          | -19,9500              | 3,696846    | -5,39649 | <,0001* | -10,7671       | -12,6525 | -9,3030  |
| AM-base+NC/primosplint                           | AM-base+BM/Palapress         | -19,9500              | 3,696846    | -5,39649 | <,0001* | -15,1385       | -17,6128 | -13,4641 |

Table S5 Failure mode and measured Shear Bond Strength in Failure Groups per Bonding interface and repair material

| Bonding interface and repair material | Storage (ageing) | Failure Mode |      |         |          |       |         |          |      |         |
|---------------------------------------|------------------|--------------|------|---------|----------|-------|---------|----------|------|---------|
|                                       |                  | adhesive     |      |         | cohesive |       |         | mixed    |      |         |
|                                       |                  | SBS(MPa)     |      |         | SBS(MPa) |       |         | SBS(MPa) |      |         |
|                                       |                  | N            | Mean | Std Dev | N        | Mean  | Std Dev | N        | Mean | Std Dev |
| PMMA-base+BM/Palapress                | dry storage      | 0            | n.a. | n.a.    | 20       | 25.18 | 2.59    | 0        | n.a. | n.a.    |
|                                       | wet storage      | 0            | n.a. | n.a.    | 20       | 23.57 | 2       | 0        | n.a. | n.a.    |
| AM-base+B/freeform plast              | dry storage      | 7            | 4.1  | 1.08    | 8        | 9.52  | 2.01    | 5        | 6.5  | 1.76    |
|                                       | wet storage      | 0            | n.a. | n.a.    | 14       | 9.62  | 1.78    | 6        | 7.07 | 0.9     |
| AM-base+FB/freeform plast             | wet storage      | 5            | 5.21 | 0.46    | 4        | 10.72 | 1.84    | 11       | 7.75 | 1.28    |
| AM-base+B-FB/freeform plast           | wet storage      | 0            | n.a. | n.a.    | 20       | 15.32 | 4.39    | 0        | n.a. | n.a.    |
| AM-base+B/freeprint splint            | dry storage      | 0            | n.a. | n.a.    | 20       | 15.76 | 3.94    | 0        | n.a. | n.a.    |
|                                       | wet storage      | 0            | n.a. | n.a.    | 13       | 9.1   | 1.08    | 7        | 7.02 | 0.95    |
| AM-base+FB/freeform fixgel            | wet storage      | 0            | n.a. | n.a.    | 18       | 14.94 | 3.19    | 2        | 8.67 | 1.74    |
| AM-base+B/freeform fixgel             | dry storage      | 11           | 7.97 | 4.65    | 2        | 16.61 | 0.39    | 7        | 7.43 | 3.55    |
|                                       | wet storage      | 0            | n.a. | n.a.    | 20       | 14.12 | 3.21    | 0        | n.a. | n.a.    |
| AM-base+B-FB/freeform fixgel          | wet storage      | 0            | n.a. | n.a.    | 19       | 11.14 | 3.2     | 1        | 6.88 | n.a.    |
| AM-base+PS/primosplint                | dry storage      | 0            | n.a. | n.a.    | 12       | 6.96  | 3.92    | 8        | 3.86 | 0.84    |
|                                       | wet storage      | 0            | n.a. | n.a.    | 12       | 8.1   | 1.42    | 8        | 5.98 | 0.88    |
| AM-base+B/primosplint                 | dry storage      | 10           | 2.13 | 1.22    | 6        | 6.28  | 1.56    | 4        | 5.29 | 2.04    |
|                                       | wet storage      | 1            | 3.98 | n.a.    | 0        | n.a.  | n.a.    | 19       | 7.39 | 1.56    |
| AM-base+B-PS/primosplint              | dry storage      | 2            | 3.16 | 1.05    | 11       | 8.29  | 2.53    | 7        | 5.29 | 1.61    |
|                                       | wet storage      | 1            | 1.3  | n.a.    | 9        | 7.92  | 1.39    | 10       | 5.14 | 1.4     |
| AM-base+M/Palapress                   | dry storage      | 0            | n.a. | n.a.    | 20       | 19.56 | 4.19    | 0        | n.a. | n.a.    |
|                                       | wet storage      | 2            | 3.88 | 1.66    | 12       | 14.97 | 4.35    | 4        | 8.01 | 1.24    |
| AM-base+B/Palapress                   | dry storage      | 0            | n.a. | n.a.    | 20       | 17.56 | 3.02    | 0        | n.a. | n.a.    |
|                                       | wet storage      | 0            | n.a. | n.a.    | 20       | 16.08 | 6.91    | 0        | n.a. | n.a.    |

**Table S5 Failure mode and measured Shear Bond Strength in Failure Groups per Bonding interface and repair material**

| Bonding interface<br>and<br>repair material | Storage<br>(ageing) | Failure Mode |      |         |          |       |         |       |      |         |
|---------------------------------------------|---------------------|--------------|------|---------|----------|-------|---------|-------|------|---------|
|                                             |                     | adhesive     |      |         | cohesive |       |         | mixed |      |         |
|                                             |                     | SBS(MPa)     |      |         |          |       |         |       |      |         |
|                                             |                     | N            | Mean | Std Dev | N        | Mean  | Std Dev | N     | Mean | Std Dev |
| AM-base+BM/Palapress                        | dry storage         | 0            | n.a. | n.a.    | 20       | 22.7  | 2.47    | 0     | n.a. | n.a.    |
|                                             | wet storage         | 0            | n.a. | n.a.    | 20       | 19.18 | 4.72    | 0     | n.a. | n.a.    |
| AM-base+NC/freeform fixgel                  | dry storage         | 10           | 3.6  | 2.01    | 6        | 7.45  | 0.94    | 1     | 3.19 | n.a.    |
|                                             | wet storage         | 13           | 7.26 | 2.37    | 2        | 10.47 | 2.21    | 5     | 9.38 | 1.11    |
| AM-base+NC/freeform plast                   | dry storage         | 15           | 3.75 | 2.47    | 2        | 8.48  | 1.24    | 3     | 5.27 | 2.19    |
|                                             | wet storage         | 19           | 3.4  | 0.74    | 0        | n.a.  | n.a.    | 1     | 5.14 | n.a.    |
| AM-base+NC/freeprint splint                 | dry storage         | 0            | n.a. | n.a.    | 20       | 13.99 | 3.31    | 0     | n.a. | n.a.    |
|                                             | wet storage         | 6            | 2.61 | 1.15    | 5        | 9.19  | 1.53    | 9     | 5.52 | 1.5     |
| AM-base+NC/Palapress                        | dry storage         | 0            | n.a. | n.a.    | 20       | 21.41 | 4.06    | 0     | n.a. | n.a.    |
|                                             | wet storage         | 0            | n.a. | n.a.    | 19       | 22.97 | 5.42    | 0     | n.a. | n.a.    |
| AM-base+NC/primosplint                      | dry storage         | 11           | 3.14 | 1.84    | 9        | 4.87  | 1.76    | 0     | n.a. | n.a.    |
|                                             | wet storage         | 18           | 2.71 | 1.27    | 0        | n.a.  | n.a.    | 2     | 5.22 | 1.26    |
